# Supplementary material for: Strength training alters the tissue fatty acids profile and slightly improves the thermogenic pathway in the adipose tissue of obese mice
Source: PubMed Central journal article supplement (PMC9050661; doi:10.1038/s41598-022-10688-w), 2022-04-28
Supplement: 41598_2022_10688_MOESM1_ESM.pdf [file 41598_2022_10688_MOESM1_ESM.pdf]

# **Strength training alters the tissue fatty acids profile and slightly improves the thermogenic pathway in the adipose tissue of obese mice**

Diego Gomes de Melo; Chadi Pellegrini Anaruma; Kellen Cristina da Cruz Rodrigues; Rodrigo Martins Pereira; Thais Dantis Pereira de Campos; Raphael Santos Canciglieri; Camila Oliveira Ramos; Dennys Esper Cintra; Eduardo Rochete Ropelle; Adelino Sanchez Ramos da Silva; José Rodrigo Pauli; Leandro Pereira de Moura\*.

## **Additional Material**

# **Strength training alters the tissue fatty acids profile and slightly improves the thermogenic pathway in the adipose tissue of obese mice**

The additional material corresponds to the RT-PCR analysis of the genes involved in the browning process of the subcutaneous adipose tissue. The data that were removed correspond to outliers that were identified after the statistical test (when using the ROUT method or when using the GRUBBS analysis).

## BEFORE ANALYSIS

| Group A    | Group B      | Group C    |
|------------|--------------|------------|
| Data Set-A | <i>Ppary</i> | Data Set-C |
| 0.20       | 2.64         | 1.92       |
| 0.07       | 1.67         | 2.14       |
| 0.13       | 4.87         | 4.93       |
| 0.14       | 1.94         | 0.10       |
| 6.11       |              |            |
| 0.07       |              |            |
| 0.30       |              |            |

## AFTER ANALYSIS

|   | Group A    | Group B      | Group C    |
|---|------------|--------------|------------|
|   | Data Set-A | <i>Ppary</i> | Data Set-C |
| 1 | 0.20       | 2.64         | 1.92       |
| 2 | 0.07       | 1.67         | 2.14       |
| 3 | 0.13       | 4.87         | 4.93       |
| 4 | 0.14       | 1.94         | 0.10       |
| 5 | 6.11*      |              |            |
| 6 | 0.07       |              |            |
| 7 | 0.30       |              |            |

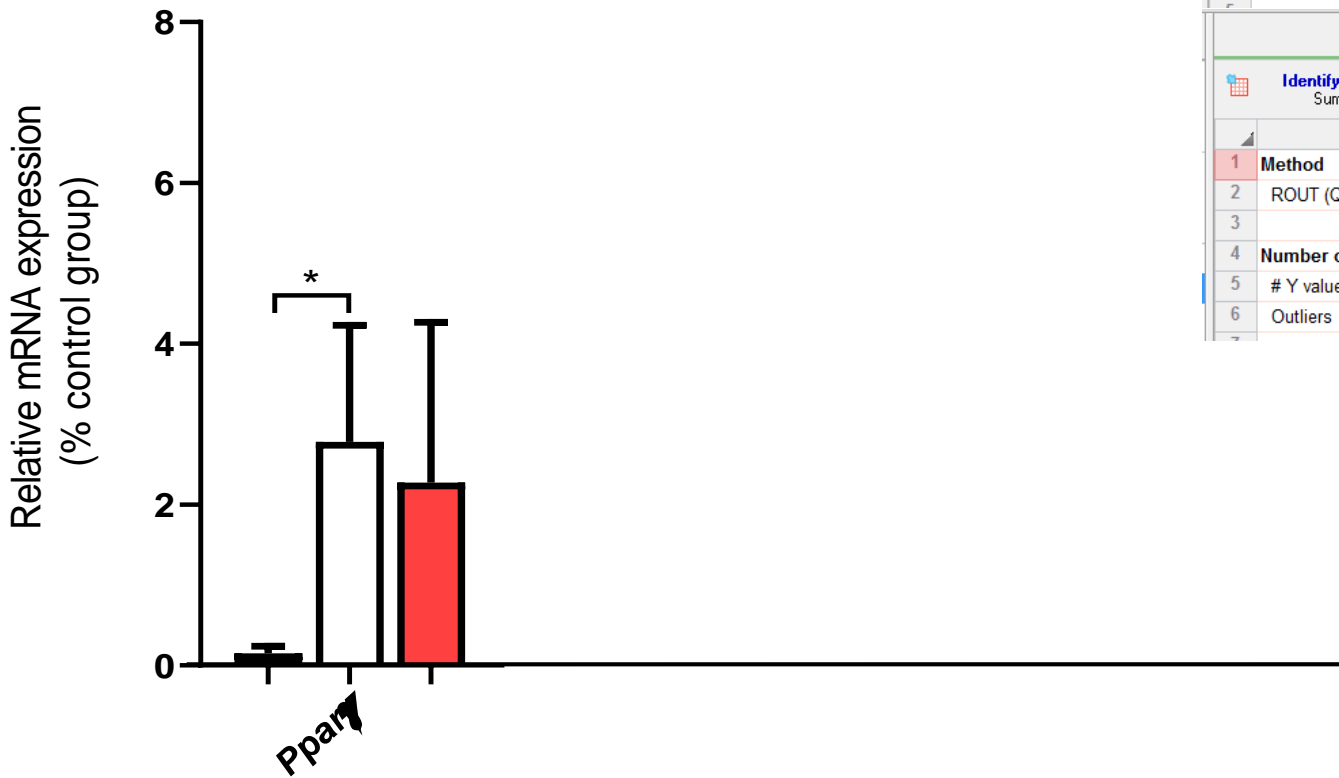

|              | A     | B     | C     | D | E | F | G | H | I | J | K |
|--------------|-------|-------|-------|---|---|---|---|---|---|---|---|
| <i>Ppary</i> |       |       |       |   |   |   |   |   |   |   |   |
| 1            | 0.200 | 2.640 | 1.920 |   |   |   |   |   |   |   |   |
| 2            | 0.070 | 1.670 | 2.140 |   |   |   |   |   |   |   |   |
| 3            | 0.130 | 4.870 | 4.930 |   |   |   |   |   |   |   |   |
| 4            | 0.140 | 1.940 | 0.100 |   |   |   |   |   |   |   |   |
| 5            |       |       |       |   |   |   |   |   |   |   |   |
| 6            | 0.070 |       |       |   |   |   |   |   |   |   |   |
| 7            | 0.300 |       |       |   |   |   |   |   |   |   |   |

|              | A     | B | C | D | E | F | G | H | I | J | K |
|--------------|-------|---|---|---|---|---|---|---|---|---|---|
| <i>Ppary</i> |       |   |   |   |   |   |   |   |   |   |   |
| 1 #5         | 6.110 |   |   |   |   |   |   |   |   |   |   |
| 2            |       |   |   |   |   |   |   |   |   |   |   |
| 3            |       |   |   |   |   |   |   |   |   |   |   |
| 4            |       |   |   |   |   |   |   |   |   |   |   |

|                       | A | B | C | D | E | F | G | H | I | J |
|-----------------------|---|---|---|---|---|---|---|---|---|---|
| <i>Ppary</i>          |   |   |   |   |   |   |   |   |   |   |
| 1 Method              |   |   |   |   |   |   |   |   |   |   |
| 2 ROUT (Q = 1%)       |   |   |   |   |   |   |   |   |   |   |
| 3                     |   |   |   |   |   |   |   |   |   |   |
| 4 Number of points    |   |   |   |   |   |   |   |   |   |   |
| 5 # Y values analyzed | 7 | 4 | 4 |   |   |   |   |   |   |   |
| 6 Outliers            | 1 | 0 | 0 |   |   |   |   |   |   |   |

**IDENTIFY OUTLIERS  
OF PPARgamma**

## BEFORE ANALYSIS

|   | Group E    | Group F                         | Group G    |
|---|------------|---------------------------------|------------|
|   | Data Set-E | <i>Pgc-1<math>\alpha</math></i> | Data Set-G |
| 1 | 0.38       | 0.70                            | 0.70       |
| 2 | 0.21       | 1.87                            | 5.89       |
| 3 | 3.13       | 1.66                            | 3.48       |
| 4 | 2.06       | 0.25                            | 5.27       |
| 5 | 0.39       |                                 |            |
| 6 | 0.73       |                                 |            |
| 7 | 0.10       |                                 |            |

## AFTER ANALYSIS

|   | Group E    | Group F                         | Group G    |
|---|------------|---------------------------------|------------|
|   | Data Set-E | <i>Pgc-1<math>\alpha</math></i> | Data Set-G |
| 1 | 0.38       | 0.70                            | 0.70       |
| 2 | 0.21       | 1.87                            | 5.89       |
| 3 | 3.13       | 1.66                            | 3.48       |
| 4 | 2.06       | 0.25                            | 5.27       |
| 5 | 0.39       |                                 |            |
| 6 | 0.73       |                                 |            |
| 7 | 0.10       |                                 |            |

|   | A     | B                               | C     | D | E | F | G | H | I | J | K |
|---|-------|---------------------------------|-------|---|---|---|---|---|---|---|---|
|   |       | <i>Pgc-1<math>\alpha</math></i> |       |   |   |   |   |   |   |   |   |
| 1 | 0.380 | 0.700                           | 0.700 |   |   |   |   |   |   |   |   |
| 2 | 0.210 | 1.870                           | 5.890 |   |   |   |   |   |   |   |   |
| 3 | 3.130 | 1.660                           | 3.480 |   |   |   |   |   |   |   |   |
| 4 | 2.060 | 0.250                           | 5.270 |   |   |   |   |   |   |   |   |
| 5 | 0.390 |                                 |       |   |   |   |   |   |   |   |   |
| 6 | 0.730 |                                 |       |   |   |   |   |   |   |   |   |
| 7 | 0.100 |                                 |       |   |   |   |   |   |   |   |   |

|   | A | B                               | C | D | E | F | G | H | I | J | K |
|---|---|---------------------------------|---|---|---|---|---|---|---|---|---|
|   |   | <i>Pgc-1<math>\alpha</math></i> |   |   |   |   |   |   |   |   |   |
| 1 |   |                                 |   |   |   |   |   |   |   |   |   |
| 2 |   |                                 |   |   |   |   |   |   |   |   |   |
| 3 |   |                                 |   |   |   |   |   |   |   |   |   |
| 4 |   |                                 |   |   |   |   |   |   |   |   |   |
| 5 |   |                                 |   |   |   |   |   |   |   |   |   |
| 6 |   |                                 |   |   |   |   |   |   |   |   |   |
| 7 |   |                                 |   |   |   |   |   |   |   |   |   |

|   | A                       | B                               | C | D | E | F | G | H | I | J | K |
|---|-------------------------|---------------------------------|---|---|---|---|---|---|---|---|---|
|   |                         | <i>Pgc-1<math>\alpha</math></i> |   |   |   |   |   |   |   |   |   |
| 1 | <b>Method</b>           |                                 |   |   |   |   |   |   |   |   |   |
| 2 | ROUT (Q = 1%)           |                                 |   |   |   |   |   |   |   |   |   |
| 3 |                         |                                 |   |   |   |   |   |   |   |   |   |
| 4 | <b>Number of points</b> |                                 |   |   |   |   |   |   |   |   |   |
| 5 | # Y values analyzed     | 7                               | 4 | 4 |   |   |   |   |   |   |   |
| 6 | Outliers                | 0                               | 0 | 0 |   |   |   |   |   |   |   |
| 7 |                         |                                 |   |   |   |   |   |   |   |   |   |

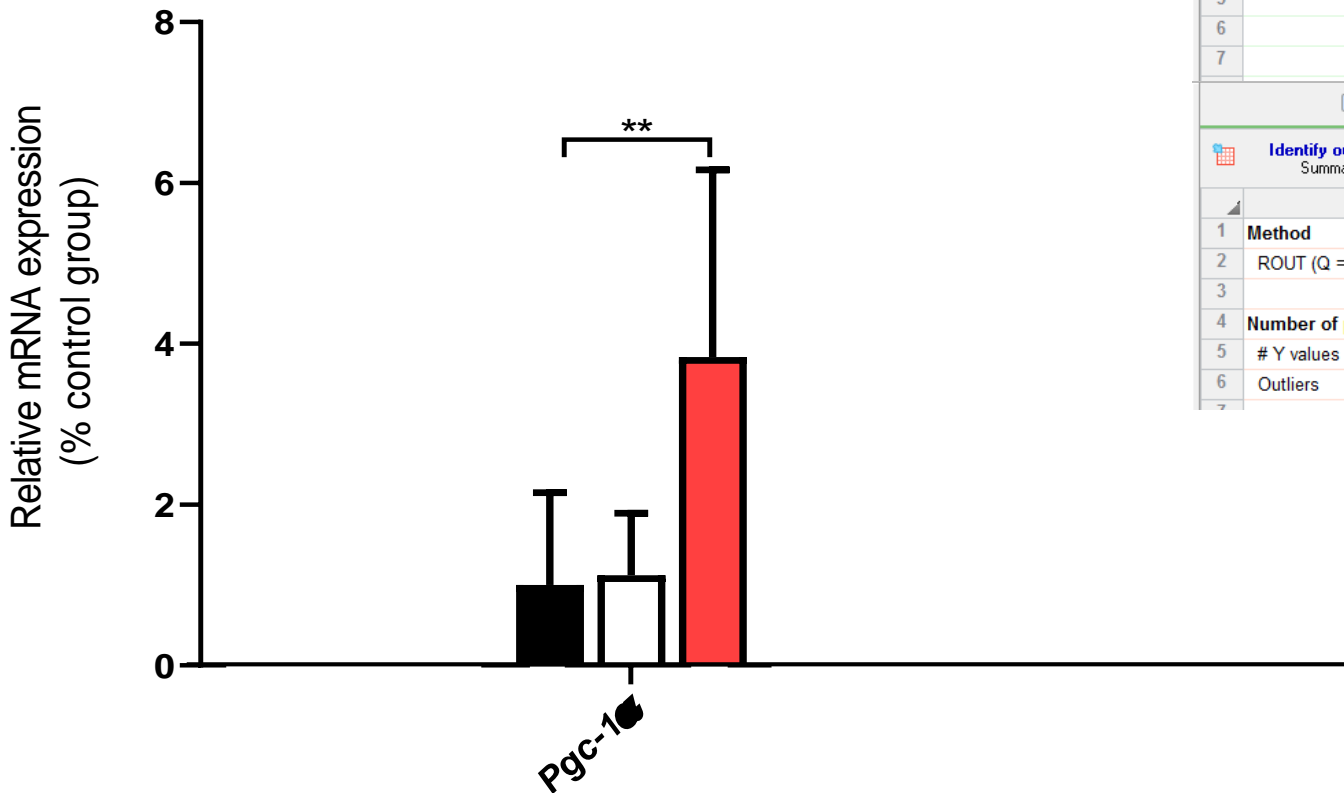

**IDENTIFY OUTLIERS  
OF PGC-1alpha**

## BEFORE ANALYSIS

|   | Group I    | Group J | Group K    |
|---|------------|---------|------------|
|   | Data Set-I | Prdm16  | Data Set-K |
| 1 | 0.33       | 1.44    | 4.26       |
| 2 | 2.72       | 2.65    | 5.14       |
| 3 | 2.07       | 11.78   | 3.81       |
| 4 | 0.12       | 0.89    | 3.85       |
| 5 | 1.25       |         |            |
| 6 | 0.28       |         |            |
| 7 | 0.24       |         |            |
| 8 |            |         |            |

## AFTER ANALYSIS

|   | Group I    | Group J | Group K    |
|---|------------|---------|------------|
|   | Data Set-I | Prdm16  | Data Set-K |
| 1 | 0.33       | 1.44    | 4.26       |
| 2 | 2.72       | 2.65    | 5.14       |
| 3 | 2.07       | 11.78*  | 3.81       |
| 4 | 0.12       | 0.89    | 3.85       |
| 5 | 1.25       |         |            |
| 6 | 0.28       |         |            |
| 7 | 0.24       |         |            |
| 8 |            |         |            |

|        | A | B     | C     | D     | E | F | G | H | I | J | K |
|--------|---|-------|-------|-------|---|---|---|---|---|---|---|
| Prdm16 |   |       |       |       |   |   |   |   |   |   |   |
| 1      |   | 0.330 | 1.440 | 4.260 |   |   |   |   |   |   |   |
| 2      |   | 2.720 | 2.650 | 5.140 |   |   |   |   |   |   |   |
| 3      |   | 2.070 |       | 3.810 |   |   |   |   |   |   |   |
| 4      |   | 0.120 | 0.890 | 3.850 |   |   |   |   |   |   |   |
| 5      |   | 1.250 |       |       |   |   |   |   |   |   |   |
| 6      |   | 0.280 |       |       |   |   |   |   |   |   |   |
| 7      |   | 0.240 |       |       |   |   |   |   |   |   |   |
| 8      |   |       |       |       |   |   |   |   |   |   |   |

|        | A  | B | C      | D | E | F | G | H | I | J | K |
|--------|----|---|--------|---|---|---|---|---|---|---|---|
| Prdm16 |    |   |        |   |   |   |   |   |   |   |   |
| 1      | #3 |   | 11.780 |   |   |   |   |   |   |   |   |
| 2      |    |   |        |   |   |   |   |   |   |   |   |
| 3      |    |   |        |   |   |   |   |   |   |   |   |
| 4      |    |   |        |   |   |   |   |   |   |   |   |
| 5      |    |   |        |   |   |   |   |   |   |   |   |
| 6      |    |   |        |   |   |   |   |   |   |   |   |
| 7      |    |   |        |   |   |   |   |   |   |   |   |

|                           | A                     | B         | C         | D         | E | F | G | H | I | J |  |
|---------------------------|-----------------------|-----------|-----------|-----------|---|---|---|---|---|---|--|
| Identify outliers Summary |                       |           |           |           |   |   |   |   |   |   |  |
| 1                         | Method                |           |           |           |   |   |   |   |   |   |  |
| 2                         | Grubbs (Alpha = 0.05) | G = 1.653 | G = 1.484 | G = 1.416 |   |   |   |   |   |   |  |
| 3                         |                       |           |           |           |   |   |   |   |   |   |  |
| 4                         | Number of points      |           |           |           |   |   |   |   |   |   |  |
| 5                         | # Y values analyzed   | 7         | 4         | 4         |   |   |   |   |   |   |  |
| 6                         | Outliers              | 0         | 1         | 0         |   |   |   |   |   |   |  |
| 7                         |                       |           |           |           |   |   |   |   |   |   |  |

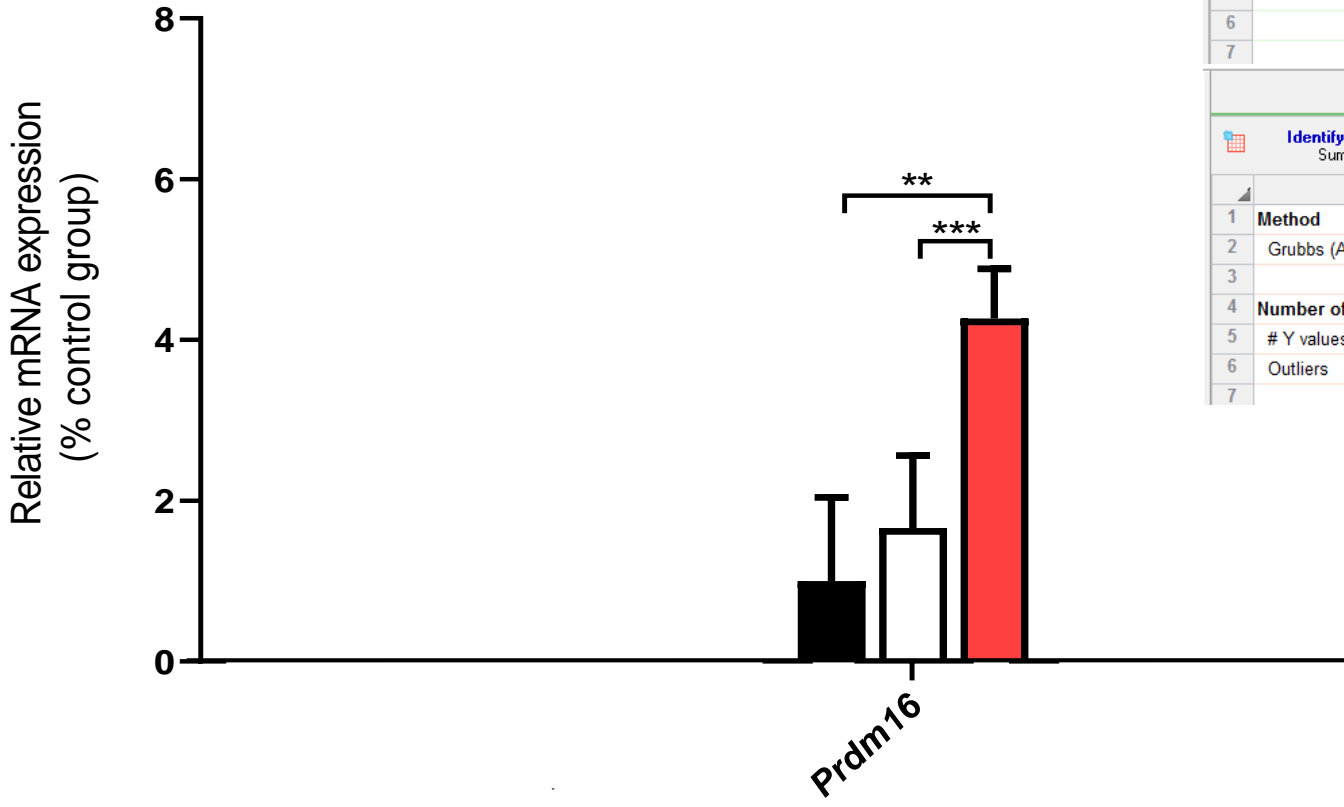

**IDENTIFY OUTLIERS  
OF PRDM16**

## BEFORE ANALYSIS

|   | Group M    | Group N     | Group O    |
|---|------------|-------------|------------|
|   | Data Set-M | <i>Ucp1</i> | Data Set-O |
| 1 | 2.71       | 0.61        | 1.38       |
| 2 | 0.05       | 0.64        | 3.58       |
| 3 | 3.31       | 0.49        | 2.29       |
| 4 | 0.01       | 0.83        | 46.90      |
| 5 | 0.33       |             |            |
| 6 | 0.28       |             |            |
| 7 | 0.31       |             |            |
| 8 |            |             |            |

## AFTER ANALYSIS 1

|   | Group M    | Group N     | Group O    |
|---|------------|-------------|------------|
|   | Data Set-M | <i>Ucp1</i> | Data Set-O |
| 1 | 2.71       | 0.61        | 1.38       |
| 2 | 0.05       | 0.64        | 3.58       |
| 3 | 3.31*      | 0.49        | 2.29       |
| 4 | 0.01       | 0.83        | 46.90*     |
| 5 | 0.33       |             |            |
| 6 | 0.28       |             |            |
| 7 | 0.31       |             |            |
| 8 |            |             |            |

|   | A | B           | C     | D     | E | F | G | H | I | J | K |
|---|---|-------------|-------|-------|---|---|---|---|---|---|---|
|   |   | <i>Ucp1</i> |       |       |   |   |   |   |   |   |   |
| 1 |   | 2.710       | 0.610 | 1.380 |   |   |   |   |   |   |   |
| 2 |   | 0.050       | 0.640 | 3.580 |   |   |   |   |   |   |   |
| 3 |   |             | 0.490 | 2.290 |   |   |   |   |   |   |   |
| 4 |   | 0.010       | 0.830 |       |   |   |   |   |   |   |   |
| 5 |   | 0.330       |       |       |   |   |   |   |   |   |   |
| 6 |   | 0.280       |       |       |   |   |   |   |   |   |   |
| 7 |   | 0.310       |       |       |   |   |   |   |   |   |   |
| 8 |   |             |       |       |   |   |   |   |   |   |   |

|   | A  | B           | C | D      | E | F | G | H | I | J | K |
|---|----|-------------|---|--------|---|---|---|---|---|---|---|
|   |    | <i>Ucp1</i> |   |        |   |   |   |   |   |   |   |
| 1 | #3 | 3.310       |   |        |   |   |   |   |   |   |   |
| 2 | #4 |             |   | 46.900 |   |   |   |   |   |   |   |
| 3 |    |             |   |        |   |   |   |   |   |   |   |
| 4 |    |             |   |        |   |   |   |   |   |   |   |
| 5 |    |             |   |        |   |   |   |   |   |   |   |
| 6 |    |             |   |        |   |   |   |   |   |   |   |
| 7 |    |             |   |        |   |   |   |   |   |   |   |
| 8 |    |             |   |        |   |   |   |   |   |   |   |

|   | A                       | B           | C | D | E | F | G | H | I | J | K |
|---|-------------------------|-------------|---|---|---|---|---|---|---|---|---|
|   |                         | <i>Ucp1</i> |   |   |   |   |   |   |   |   |   |
| 1 | <b>Method</b>           |             |   |   |   |   |   |   |   |   |   |
| 2 | ROUT (Q = 1%)           |             |   |   |   |   |   |   |   |   |   |
| 3 |                         |             |   |   |   |   |   |   |   |   |   |
| 4 | <b>Number of points</b> |             |   |   |   |   |   |   |   |   |   |
| 5 | # Y values analyzed     | 7           | 4 | 4 |   |   |   |   |   |   |   |
| 6 | Outliers                | 1           | 0 | 1 |   |   |   |   |   |   |   |
| 7 |                         |             |   |   |   |   |   |   |   |   |   |
| 8 |                         |             |   |   |   |   |   |   |   |   |   |

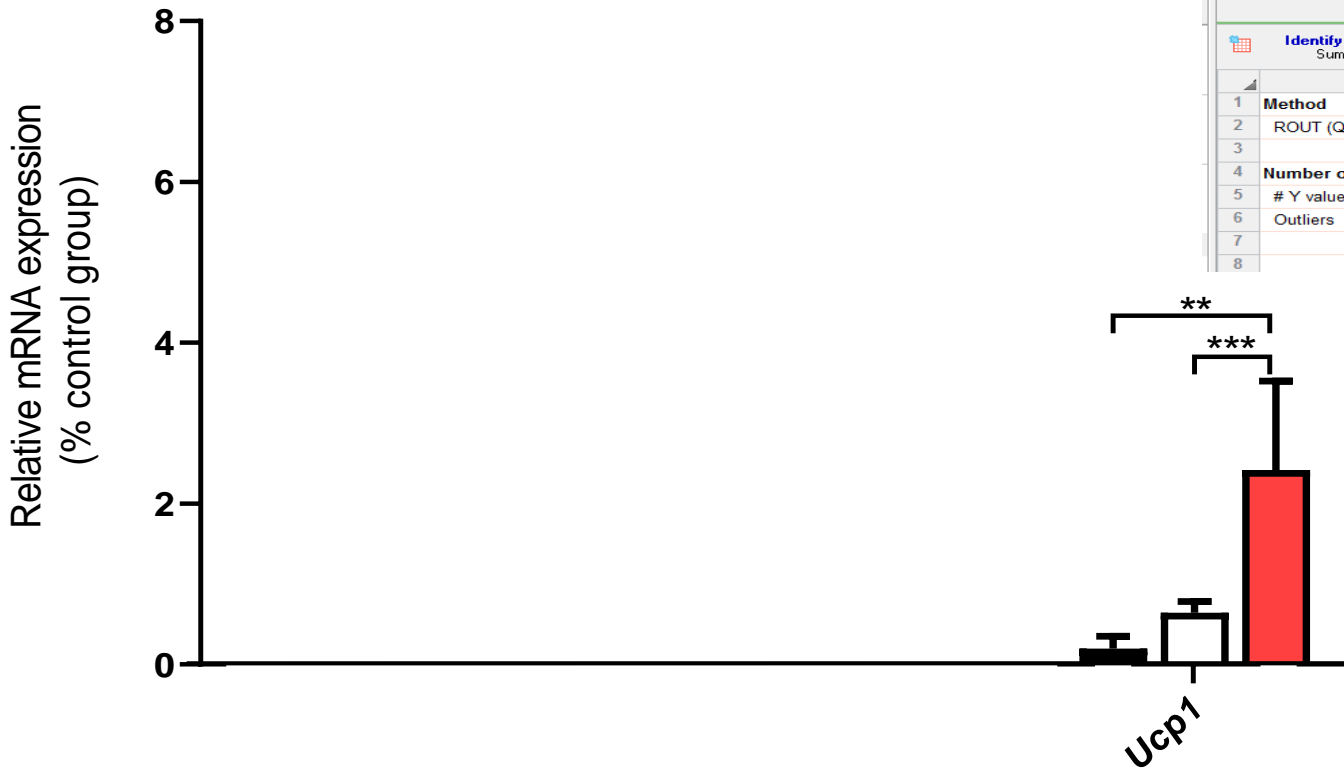

**IDENTIFY OUTLIERS  
OF UCP1**

## BEFORE ANALYSIS

## AFTER ANALYSIS 2

|   | Group M    | Group N     | Group O    |
|---|------------|-------------|------------|
|   | Data Set-M | <i>Ucp1</i> | Data Set-O |
| 1 | 2.71       | 0.61        | 1.38       |
| 2 | 0.05       | 0.64        | 3.58       |
| 3 | 3.31       | 0.49        | 2.29       |
| 4 | 0.01       | 0.83        | 46.90      |
| 5 | 0.33       |             |            |
| 6 | 0.28       |             |            |
| 7 | 0.31       |             |            |
| 8 |            |             |            |

|   | Group M    | Group N     | Group O    |
|---|------------|-------------|------------|
|   | Data Set-M | <i>Ucp1</i> | Data Set-O |
| 1 | 2.71*      | 0.61        | 1.38       |
| 2 | 0.05       | 0.64        | 3.58       |
| 3 | 3.31*      | 0.49        | 2.29       |
| 4 | 0.01       | 0.83        | 46.90*     |
| 5 | 0.33       |             |            |
| 6 | 0.28       |             |            |
| 7 | 0.31       |             |            |
| 8 |            |             |            |

|   | Group M    | Group N     | Group O    |
|---|------------|-------------|------------|
|   | Data Set-M | <i>Ucp1</i> | Data Set-O |
| 1 | 2.710      |             |            |
| 2 |            |             |            |
| 3 |            |             |            |
| 4 |            |             |            |
| 5 |            |             |            |
| 6 |            |             |            |
| 7 |            |             |            |
| 8 |            |             |            |

|   | Group M             | Group N     | Group O    |   |
|---|---------------------|-------------|------------|---|
|   | Data Set-M          | <i>Ucp1</i> | Data Set-O |   |
| 1 | Method              |             |            |   |
| 2 | ROUT (Q = 1%)       |             |            |   |
| 3 |                     |             |            |   |
| 4 | Number of points    |             |            |   |
| 5 | # Y values analyzed | 6           | 4          | 3 |
| 6 | Outliers            | 1           | 0          | 0 |
| 7 |                     |             |            |   |
| 8 |                     |             |            |   |

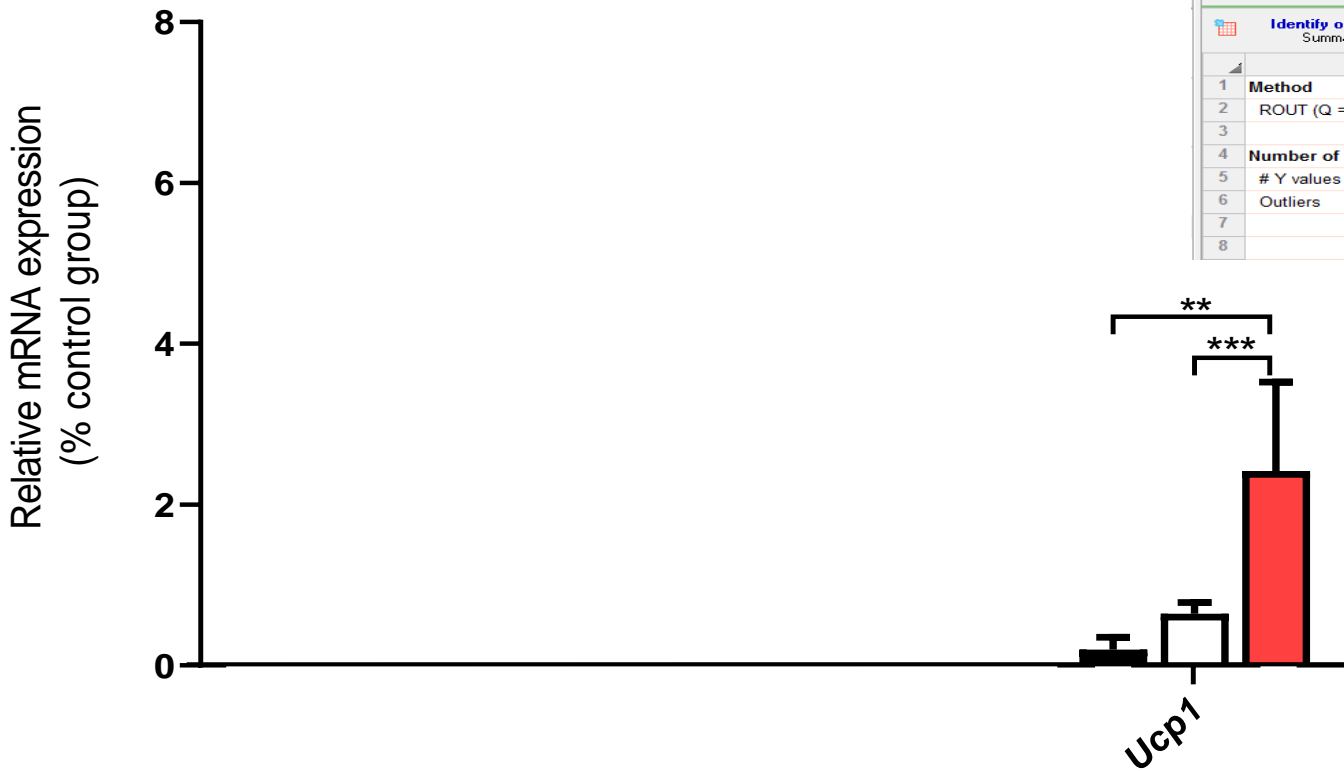

**IDENTIFY OUTLIERS  
OF UCP1**
