# Supplementary material for: Strength training alters the tissue fatty acids profile and slightly improves the thermogenic pathway in the adipose tissue of obese mice
Source: PubMed Central journal article supplement (PMC9050661; doi:10.1038/s41598-022-10688-w), 2022-04-28
Supplement: 41598_2022_10688_MOESM2_ESM.pdf [file 41598_2022_10688_MOESM2_ESM.pdf]

# **Strength training alters the tissue fatty acids profile and slightly improves the thermogenic pathway in the adipose tissue of obese mice**

Diego Gomes de Melo; Chadi Pellegrini Anaruma; Kellen Cristina da Cruz Rodrigues; Rodrigo Martins Pereira; Thais Dantis Pereira de Campos; Raphael Santos Canciglieri; Camila Oliveira Ramos; Dennys Esper Cintra; Eduardo Rochete Ropelle; Adelino Sanchez Ramos da Silva; José Rodrigo Pauli; Leandro Pereira de Moura\*.

## **Supplementary Material**

### Fig. 1A

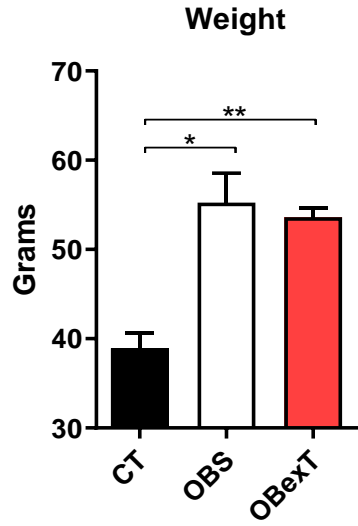

| CT   | OBS  | OBexT | Tukey's multiple comparisons test | Mean Diff.    | 95.00% CI of diff. | Significant?      | Summary            | Adjusted P Value |           |          |           |
|------|------|-------|-----------------------------------|---------------|--------------------|-------------------|--------------------|------------------|-----------|----------|-----------|
|      |      |       | CT vs. OBS                        | -16.32        | -25.42 to -7.207   | Yes               | **                 | 0.0014           | A-B       |          |           |
| 37.1 | 47.7 | 56.7  | CT vs. OBexT                      | -14.68        | -23.78 to -5.567   | Yes               | **                 | 0.0030           | A-C       |          |           |
| 36.6 | 53.6 | 50.5  | OBS vs. OBexT                     | 1.640         | -6.947 to 10.23    | No                | ns                 | 0.8653           | B-C       |          |           |
| 43.9 | 49.8 | 52.8  | <b>Test details</b>               | <b>Mean 1</b> | <b>Mean 2</b>      | <b>Mean Diff.</b> | <b>SE of diff.</b> | <b>n1</b>        | <b>n2</b> | <b>q</b> | <b>DF</b> |
| 38.1 | 59.0 | 55.1  | CT vs. OBS                        | 38.93         | 55.24              | -16.32            | 3.372              | 4                | 5         | 6.842    | 11        |
|      | 66.1 | 52.9  | CT vs. OBexT                      | 38.93         | 53.60              | -14.68            | 3.372              | 4                | 5         | 6.154    | 11        |
|      |      |       | OBS vs. OBexT                     | 55.24         | 53.60              | 1.640             | 3.179              | 5                | 5         | 0.7295   | 11        |

### Fig. 1B

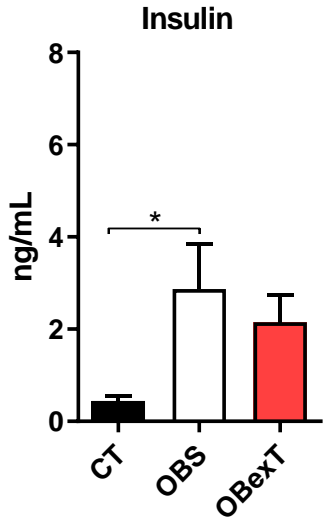

| CT      | OBS     | OBexT   | Tukey's multiple comparison | Mean Diff.    | 95.00% CI of diff.  | Significant?      | Summary            | Adjusted P Value |           |          |           |
|---------|---------|---------|-----------------------------|---------------|---------------------|-------------------|--------------------|------------------|-----------|----------|-----------|
|         |         |         | CT vs. OBS                  | -2.422        | -4.839 to -0.005315 | Yes               | *                  | 0.0495           | A-B       |          |           |
| 0.77321 | 0.80476 | 0.95813 | CT vs. OBexT                | -1.704        | -4.121 to 0.7125    | No                | ns                 | 0.1932           | A-C       |          |           |
| 0.73841 | 0.49831 | 4.48792 | OBS vs. OBexT               | 0.7178        | -1.699 to 3.135     | No                | ns                 | 0.7256           | B-C       |          |           |
| 0.15697 | 2.56716 | 3.26488 | <b>Test details</b>         | <b>Mean 1</b> | <b>Mean 2</b>       | <b>Mean Diff.</b> | <b>SE of diff.</b> | <b>n1</b>        | <b>n2</b> | <b>q</b> | <b>DF</b> |
| 0.32984 | 6.81233 | 0.82163 | CT vs. OBS                  | 0.4460        | 2.868               | -2.422            | 0.9305             | 6                | 6         | 3.681    | 15        |
| 0.22986 | 2.20164 | 2.00792 | CT vs. OBexT                | 0.4460        | 2.150               | -1.704            | 0.9305             | 6                | 6         | 2.590    | 15        |
| 0.44753 | 4.32450 | 1.36124 | OBS vs. OBexT               | 2.868         | 2.150               | 0.7178            | 0.9305             | 6                | 6         | 1.091    | 15        |

# Fig. 1C

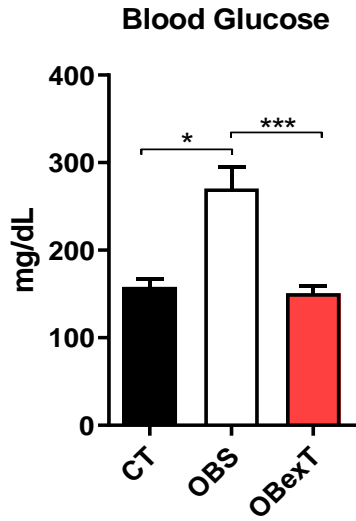

| CT    | OBS   | OBExT | Tukey's multiple comparisons test | Mean Diff. | 95.00% CI of diff. | Significant? | Summary     | Adjusted P Value |     |        |    |
|-------|-------|-------|-----------------------------------|------------|--------------------|--------------|-------------|------------------|-----|--------|----|
|       |       |       | CT vs. OBS                        | -112.4     | -179.1 to -45.74   | Yes          | **          | 0.0022           | A-B |        |    |
|       |       |       | CT vs. OBExT                      | 7.200      | -59.46 to 73.86    | No           | ns          | 0.9544           | A-C |        |    |
|       |       |       | OBS vs. OBExT                     | 119.6      | 56.75 to 182.4     | Yes          | ***         | 0.0009           | B-C |        |    |
| 152.0 | 333.0 | 125.0 |                                   |            |                    |              |             |                  |     |        |    |
| 179.0 | 313.0 | 154.0 |                                   |            |                    |              |             |                  |     |        |    |
| 163.0 | 282.0 | 157.0 |                                   |            |                    |              |             |                  |     |        |    |
| 138.0 | 212.0 | 144.0 |                                   |            |                    |              |             |                  |     |        |    |
|       | 212.0 | 174.0 |                                   |            |                    |              |             |                  |     |        |    |
|       |       |       | Test details                      | Mean 1     | Mean 2             | Mean Diff.   | SE of diff. | n1               | n2  | q      | DF |
|       |       |       | CT vs. OBS                        | 158.0      | 270.4              | -112.4       | 24.68       | 4                | 5   | 6.441  | 11 |
|       |       |       | CT vs. OBExT                      | 158.0      | 150.8              | 7.200        | 24.68       | 4                | 5   | 0.4126 | 11 |
|       |       |       | OBS vs. OBExT                     | 270.4      | 150.8              | 119.6        | 23.27       | 5                | 5   | 7.269  | 11 |

# Fig. 1D

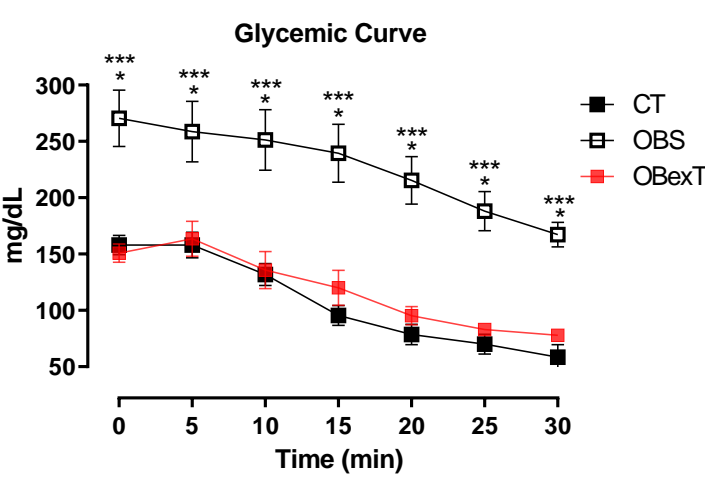

| Min | CT   |      |      |      |      | OBS  |      |      |      |      | OBExT |      |      |      |      |
|-----|------|------|------|------|------|------|------|------|------|------|-------|------|------|------|------|
| X   | A:Y1 | A:Y2 | A:Y3 | A:Y4 | A:Y5 | B:Y1 | B:Y2 | B:Y3 | B:Y4 | B:Y5 | C:Y1  | C:Y2 | C:Y3 | C:Y4 | C:Y5 |
| 0   | 152  | 179  | 163  | 138  |      | 333  | 313  | 282  | 212  | 212  | 125   | 154  | 157  | 144  | 174  |
| 5   | 167  | 163  | 177  | 125  |      | 344  | 282  | 261  | 187  | 219  | 120   | 152  | 196  | 148  | 202  |
| 10  | 139  | 130  | 152  | 106  |      | 327  | 288  | 258  | 183  | 200  | 96    | 102  | 167  | 137  | 177  |
| 15  | 110  | 100  | 102  | 70   |      | 305  | 279  | 251  | 167  | 195  | 80    | 92   | 143  | 122  | 163  |
| 20  | 91   | 81   | 90   | 52   |      | 266  | 261  | 203  | 158  | 189  | 67    | 90   | 108  | 98   | 113  |
| 25  | 86   | 66   | 81   | 47   |      | 241  | 206  | 180  | 135  | 178  | 66    | 84   | 96   | 78   | 91   |
| 30  | 85   | 52   | 65   | 32   |      | 195  | 189  | 158  | 135  | 159  | 62    | 80   | 88   | 72   | 87   |

| Tukey's multiple comparisons test | Mean Diff. | 95.00% CI of diff. | Significant? | Summary | Adjusted P Value |
|-----------------------------------|------------|--------------------|--------------|---------|------------------|
| Row 1                             |            |                    |              |         |                  |
| CT vs. OBS                        | -112.4     | -199.6 to -25.16   | Yes          | *       | 0.0196           |
| CT vs. OBExT                      | 7.200      | -28.07 to 42.47    | No           | ns      | 0.8205           |
| OBS vs. OBExT                     | 119.6      | 32.32 to 206.9     | Yes          | *       | 0.0156           |
| Row 2                             |            |                    |              |         |                  |
| CT vs. OBS                        | -100.6     | -193.8 to -7.420   | Yes          | *       | 0.0377           |
| CT vs. OBExT                      | -5.600     | -62.58 to 51.38    | No           | ns      | 0.9546           |
| OBS vs. OBExT                     | 95.00      | 1.212 to 188.8     | Yes          | *       | 0.0476           |
| Row 3                             |            |                    |              |         |                  |
| CT vs. OBS                        | -119.5     | -212.4 to -26.55   | Yes          | *       | 0.0196           |
| CT vs. OBExT                      | -4.050     | -61.89 to 53.79    | No           | ns      | 0.9756           |
| OBS vs. OBExT                     | 115.4      | 21.41 to 209.4     | Yes          | *       | 0.0209           |
| Row 4                             |            |                    |              |         |                  |
| CT vs. OBS                        | -143.9     | -233.0 to -54.84   | Yes          | **      | 0.0078           |
| CT vs. OBExT                      | -24.50     | -78.60 to 29.60    | No           | ns      | 0.4065           |
| OBS vs. OBExT                     | 119.4      | 29.60 to 209.2     | Yes          | *       | 0.0145           |
| Row 5                             |            |                    |              |         |                  |
| CT vs. OBS                        | -136.9     | -209.3 to -64.46   | Yes          | **      | 0.0034           |
| CT vs. OBExT                      | -16.70     | -53.22 to 19.82    | No           | ns      | 0.4082           |
| OBS vs. OBExT                     | 120.2      | 47.93 to 192.5     | Yes          | **      | 0.0065           |
| Row 6                             |            |                    |              |         |                  |
| CT vs. OBS                        | -118.0     | -178.7 to -57.35   | Yes          | **      | 0.0026           |
| CT vs. OBExT                      | -13.00     | -46.13 to 20.13    | No           | ns      | 0.4664           |
| OBS vs. OBExT                     | 105.0      | 44.33 to 165.7     | Yes          | **      | 0.0062           |
| Row 7                             |            |                    |              |         |                  |
| CT vs. OBS                        | -108.7     | -155.2 to -62.25   | Yes          | ***     | 0.0006           |
| CT vs. OBExT                      | -19.30     | -61.93 to 23.33    | No           | ns      | 0.3468           |
| OBS vs. OBExT                     | 89.40      | 51.39 to 127.4     | Yes          | **      | 0.0011           |

### Fig. 1E

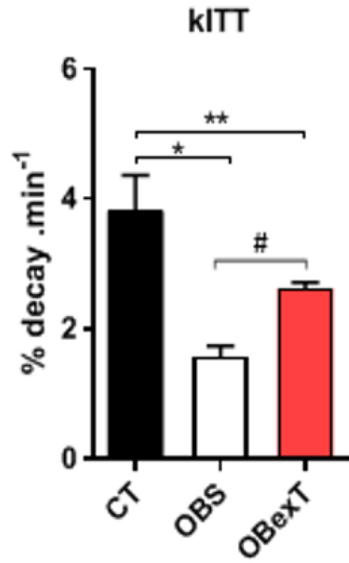

| CT          | OBS         | OBexT       | Tukey's multiple comparisons test | Mean Diff.    | 95.00% CI of diff. | Significant?      | Summary            | Adjusted P Value |           |          |           |
|-------------|-------------|-------------|-----------------------------------|---------------|--------------------|-------------------|--------------------|------------------|-----------|----------|-----------|
|             |             |             | CT vs. OBS                        | 2.251         | 1.113 to 3.389     | Yes               | ***                | 0.0006           | A-B       |          |           |
|             |             |             | CT vs. OBexT                      | 1.196         | 0.05871 to 2.334   | Yes               | *                  | 0.0394           | A-C       |          |           |
| 2.496139466 | 1.802558646 | 2.613476879 | OBS vs. OBexT                     | -1.055        | -2.127 to 0.01801  | No                | ns                 | 0.0540           | B-C       |          |           |
| 4.278358911 | 1.599907431 | 2.340048922 |                                   |               |                    |                   |                    |                  |           |          |           |
| 3.461114856 | 1.943440595 | 2.571516067 | <b>Test details</b>               | <b>Mean 1</b> | <b>Mean 2</b>      | <b>Mean Diff.</b> | <b>SE of diff.</b> | <b>n1</b>        | <b>n2</b> | <b>q</b> | <b>DF</b> |
| 5.037914996 | 1.537495204 | 2.639615631 | CT vs. OBS                        | 3.818         | 1.567              | 2.251             | 0.4213             | 4                | 5         | 7.557    | 11        |
|             | 0.952994948 | 2.945014170 | CT vs. OBexT                      | 3.818         | 2.622              | 1.196             | 0.4213             | 4                | 5         | 4.017    | 11        |
|             |             |             | OBS vs. OBexT                     | 1.567         | 2.622              | -1.055            | 0.3972             | 5                | 5         | 3.755    | 11        |

### Fig. 1F

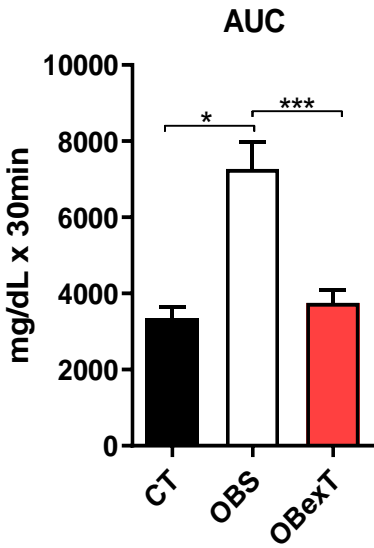

| CT      | OBS     | OBexT   | Tukey's multiple comparisons test | Mean Diff.    | 95.00% CI of diff. | Significant?      | Summary            | Adjusted P Value |           |          |           |
|---------|---------|---------|-----------------------------------|---------------|--------------------|-------------------|--------------------|------------------|-----------|----------|-----------|
|         |         |         | CT vs. OBS                        | -3919         | -5882 to -1955     | Yes               | ***                | 0.0006           | A-B       |          |           |
|         |         |         | CT vs. OBexT                      | -397.8        | -2361 to 1566      | No                | ns                 | 0.8500           | A-C       |          |           |
| 3770.00 | 9222.50 | 2767.50 | OBS vs. OBexT                     | 3521          | 1670 to 5372       | Yes               | ***                | 0.0009           | B-C       |          |           |
| 3407.50 | 8307.50 | 3385.00 |                                   |               |                    |                   |                    |                  |           |          |           |
| 3742.50 | 7260.00 | 4382.50 | <b>Test details</b>               | <b>Mean 1</b> | <b>Mean 2</b>      | <b>Mean Diff.</b> | <b>SE of diff.</b> | <b>n1</b>        | <b>n2</b> | <b>q</b> | <b>DF</b> |
| 2505.00 | 5355.00 | 3635.00 | CT vs. OBS                        | 3356          | 7275               | -3919             | 727.0              | 4                | 5         | 7.623    | 11        |
|         | 6230.00 | 4600.00 | CT vs. OBexT                      | 3356          | 3754               | -397.8            | 727.0              | 4                | 5         | 0.7737   | 11        |
|         |         |         | OBS vs. OBexT                     | 7275          | 3754               | 3521              | 685.4              | 5                | 5         | 7.265    | 11        |

# Fig. 2A

## Total Cholesterol

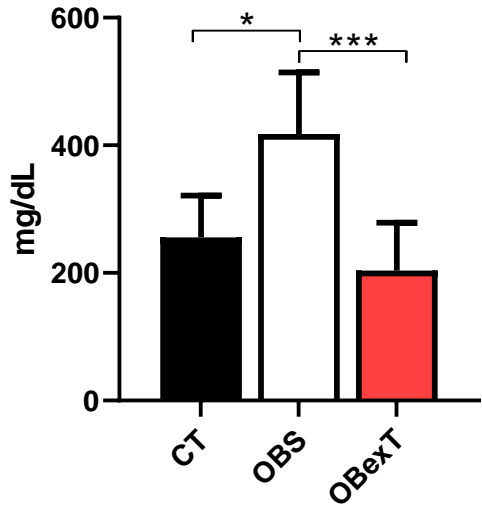

| CT     | OBS        | OBexT      | Bonferroni's multiple comparisons test | Mean Diff. | 95.00% CI of diff. | Significant? | Summary     | Adjusted P Value |     |       |    |
|--------|------------|------------|----------------------------------------|------------|--------------------|--------------|-------------|------------------|-----|-------|----|
|        |            |            | CT vs. OBS                             | -162.3     | -295.3 to -29.23   | Yes          | *           | 0.0153           | A-B |       |    |
| 171.43 | 507.936508 | 266.666667 | CT vs. OBexT                           | 51.75      | -81.30 to 184.8    | No           | ns          | 0.9252           | A-C |       |    |
| 339.68 | 363.492063 | 133.333333 | OBS vs. OBexT                          | 214.0      | 87.16 to 340.9     | Yes          | **          | 0.0013           | B-C |       |    |
| 211.11 | 560.317460 | 161.904762 |                                        |            |                    |              |             |                  |     |       |    |
| 286.51 | 352.380952 | 174.603175 | Test details                           | Mean 1     | Mean 2             | Mean Diff.   | SE of diff. | n1               | n2  | t     | DF |
| 269.84 | 315.873016 | 161.904762 | CT vs. OBS                             | 255.7      | 418.0              | -162.3       | 48.96       | 5                | 6   | 3.315 | 14 |
|        | 407.936508 | 325.396825 | CT vs. OBexT                           | 255.7      | 204.0              | 51.75        | 48.96       | 5                | 6   | 1.057 | 14 |
|        |            |            | OBS vs. OBexT                          | 418.0      | 204.0              | 214.0        | 46.68       | 6                | 6   | 4.585 | 14 |

# Fig. 2B

## Triglycerides

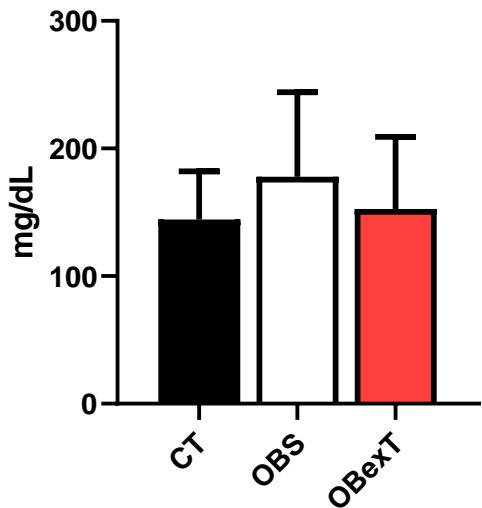

| CT         | OBS      | OBexT    | Bonferroni's multiple comparisons test | Mean Diff. | 95.00% CI of diff. | Significant? | Summary     | Adjusted P Value |     |        |    |
|------------|----------|----------|----------------------------------------|------------|--------------------|--------------|-------------|------------------|-----|--------|----|
|            |          |          | CT vs. OBS                             | -33.38     | -125.3 to 58.55    | No           | ns          | >0.9999          | E-F |        |    |
| 121.212121 | 115.1515 | 136.3636 | CT vs. OBexT                           | -8.258     | -100.2 to 83.67    | No           | ns          | >0.9999          | E-G |        |    |
| 125.757576 | 124.2424 | 107.5758 | OBS vs. OBexT                          | 25.13      | -62.53 to 112.8    | No           | ns          | >0.9999          | F-G |        |    |
| 130.303030 | 115.1515 | 116.6667 | Test details                           | Mean 1     | Mean 2             | Mean Diff.   | SE of diff. | n1               | n2  | t      | DF |
| 133.333333 | 253.0303 | 110.6061 | CT vs. OBS                             | 144.4      | 177.8              | -33.38       | 33.83       | 5                | 6   | 0.9869 | 14 |
| 211.363636 | 218.1818 | 200.7576 | CT vs. OBexT                           | 144.4      | 152.7              | -8.258       | 33.83       | 5                | 6   | 0.2441 | 14 |
|            | 240.9091 | 243.9394 | OBS vs. OBexT                          | 177.8      | 152.7              | 25.13        | 32.25       | 6                | 6   | 0.7790 | 14 |

**Fig. 2C**

**HDL**

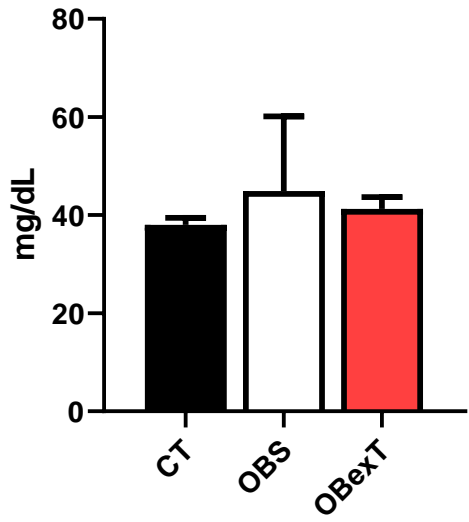

| CT     | OBS    | OBexT  | Bonferroni's multiple comparisons test |               | Mean Diff.    | 95.00% CI of diff. | Significant?       | Summary   | Adjusted P Value |          |           |  |
|--------|--------|--------|----------------------------------------|---------------|---------------|--------------------|--------------------|-----------|------------------|----------|-----------|--|
|        |        |        | CT vs. OBS                             |               | -6.926        | -22.09 to 8.240    | No                 | ns        | 0.7049           | M-N      |           |  |
|        |        |        | CT vs. OBexT                           |               | -3.296        | -18.46 to 11.87    | No                 | ns        | >0.9999          | M-O      |           |  |
|        |        |        | OBS vs. OBexT                          |               | 3.630         | -10.83 to 18.09    | No                 | ns        | >0.9999          | N-O      |           |  |
|        |        |        |                                        |               |               |                    |                    |           |                  |          |           |  |
| 36.889 | 37.333 | 40.000 |                                        |               |               |                    |                    |           |                  |          |           |  |
| 37.778 | 40.444 | 40.889 |                                        |               |               |                    |                    |           |                  |          |           |  |
| 36.889 | 37.778 | 41.778 | <b>Test details</b>                    | <b>Mean 1</b> | <b>Mean 2</b> | <b>Mean Diff.</b>  | <b>SE of diff.</b> | <b>n1</b> | <b>n2</b>        | <b>t</b> | <b>DF</b> |  |
| 40.444 | 37.778 | 45.778 | CT vs. OBS                             | 38.00         | 44.93         | -6.926             | 5.580              | 5         | 6                | 1.241    | 14        |  |
| 38.000 | 40.444 | 40.444 | CT vs. OBexT                           | 38.00         | 41.30         | -3.296             | 5.580              | 5         | 6                | 0.5907   | 14        |  |
|        | 75.778 | 38.889 | OBS vs. OBexT                          | 44.93         | 41.30         | 3.630              | 5.321              | 6         | 6                | 0.6821   | 14        |  |

### Fig. 3A

#### Saturated Fatty Acids

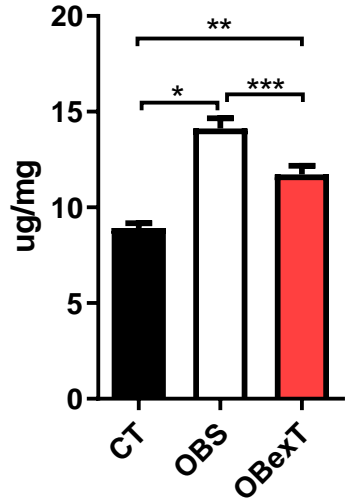

| CT   | OBS   | OBexT |
|------|-------|-------|
| 8.56 | 12.26 | 11.11 |
| 8.61 | 14.63 | 12.06 |
| 8.42 | 15.99 | 10.34 |
| 9.21 | 14.24 | 12.00 |
| 9.80 | 14.63 | 13.08 |
|      | 12.96 | 9.63  |

| Bonferroni's multiple comparisons test |  | Mean Diff. | 95.00% CI of diff. | Significant? | Summary     |    |    |       |    |
|----------------------------------------|--|------------|--------------------|--------------|-------------|----|----|-------|----|
| CT vs. OBS                             |  | -5.198     | -7.071 to -3.326   | Yes          | ****        |    |    | A-B   |    |
| CT vs. OBexT                           |  | -2.450     | -4.322 to -0.5776  | Yes          | **          |    |    | A-C   |    |
| OBS vs. OBexT                          |  | 2.748      | 0.9630 to 4.534    | Yes          | **          |    |    | B-C   |    |
| Test details                           |  | Mean 1     | Mean 2             | Mean Diff.   | SE of diff. | n1 | n2 | t     | DF |
| CT vs. OBS                             |  | 8.920      | 14.12              | -5.198       | 0.6890      | 5  | 6  | 7.545 | 14 |
| CT vs. OBexT                           |  | 8.920      | 11.37              | -2.450       | 0.6890      | 5  | 6  | 3.556 | 14 |
| OBS vs. OBexT                          |  | 14.12      | 11.37              | 2.748        | 0.6569      | 6  | 6  | 4.184 | 14 |

### Fig. 3B

#### Monounsaturated Fatty Acids

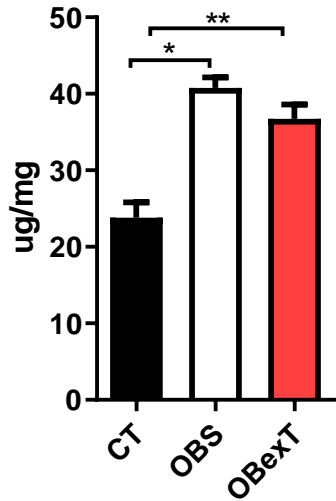

| CT    | OBS   | OBexT |
|-------|-------|-------|
| 17.81 | 35.26 | 35.86 |
| 24.62 | 44.15 | 40.53 |
| 21.06 | 42.72 | 38.97 |
| 21.82 | 41.17 | 34.26 |
| 25.49 | 43.06 | 41.55 |
|       | 38.23 | 29.32 |

| Bonferroni's multiple comparisons test |  | Mean Diff. | 95.00% CI of diff. | Significant? | Summary     |    |    |       |    |
|----------------------------------------|--|------------|--------------------|--------------|-------------|----|----|-------|----|
| CT vs. OBS                             |  | -18.61     | -24.81 to -12.40   | Yes          | ****        |    |    | A-B   |    |
| CT vs. OBexT                           |  | -14.59     | -20.80 to -8.379   | Yes          | ****        |    |    | A-C   |    |
| OBS vs. OBexT                          |  | 4.017      | -1.903 to 9.937    | No           | ns          |    |    | B-C   |    |
| Test details                           |  | Mean 1     | Mean 2             | Mean Diff.   | SE of diff. | n1 | n2 | t     | DF |
| CT vs. OBS                             |  | 22.16      | 40.77              | -18.61       | 2.285       | 5  | 6  | 8.144 | 14 |
| CT vs. OBexT                           |  | 22.16      | 36.75              | -14.59       | 2.285       | 5  | 6  | 6.386 | 14 |
| OBS vs. OBexT                          |  | 40.77      | 36.75              | 4.017        | 2.178       | 6  | 6  | 1.844 | 14 |

# Fig. 3C

## Polyunsaturated Fatty Acids

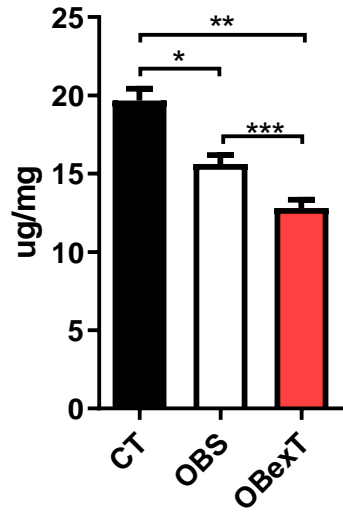

| CT    | OBS   | OBExT |
|-------|-------|-------|
| 17.79 | 13.39 | 12.06 |
| 21.78 | 17.54 | 13.88 |
| 18.66 | 15.37 | 13.03 |
| 18.93 | 15.55 | 11.63 |
| 21.17 | 16.64 | 14.65 |
|       | 15.23 | 11.61 |

| Bonferroni's multiple comparisons test |  |  | Mean Diff. | 95.00% CI of diff. | Significant? | Summary     |    |    |       |     |
|----------------------------------------|--|--|------------|--------------------|--------------|-------------|----|----|-------|-----|
| CT vs. OBS                             |  |  | 4.046      | 1.649 to 6.443     | Yes          | **          |    |    |       | A-B |
| CT vs. OBExT                           |  |  | 6.856      | 4.459 to 9.253     | Yes          | ****        |    |    |       | A-C |
| OBS vs. OBExT                          |  |  | 2.810      | 0.5247 to 5.095    | Yes          | *           |    |    |       | B-C |
| Test details                           |  |  | Mean 1     | Mean 2             | Mean Diff.   | SE of diff. | n1 | n2 | t     | DF  |
| CT vs. OBS                             |  |  | 19.67      | 15.62              | 4.046        | 0.8819      | 5  | 6  | 4.588 | 14  |
| CT vs. OBExT                           |  |  | 19.67      | 12.81              | 6.856        | 0.8819      | 5  | 6  | 7.774 | 14  |
| OBS vs. OBExT                          |  |  | 15.62      | 12.81              | 2.810        | 0.8409      | 6  | 6  | 3.342 | 14  |

# Fig. 3D

## C14:0

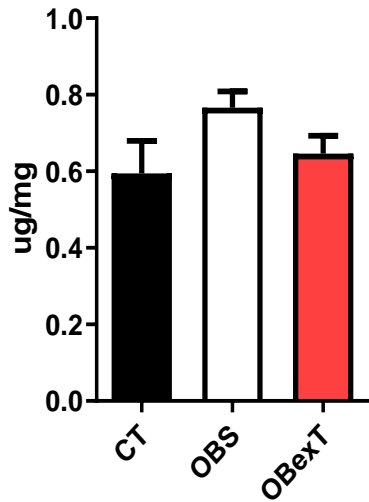

| CT   | OBS  | OBExT |
|------|------|-------|
| 0.96 | 0.64 | 0.47  |
| 0.44 | 0.81 | 0.66  |
| 0.47 | 0.85 | 0.59  |
| 0.69 | 0.65 | 0.79  |
| 0.60 | 0.89 | 0.74  |
|      | 0.76 | 0.63  |

| Bonferroni's multiple comparisons test |  |  | Mean Diff. | 95.00% CI of diff. | Significant? | Summary     |    |    |        |     |
|----------------------------------------|--|--|------------|--------------------|--------------|-------------|----|----|--------|-----|
| CT vs. OBS                             |  |  | -0.1347    | -0.3727 to 0.1034  | No           | ns          |    |    |        | A-B |
| CT vs. OBExT                           |  |  | -0.01467   | -0.2527 to 0.2234  | No           | ns          |    |    |        | A-C |
| OBS vs. OBExT                          |  |  | 0.1200     | -0.1070 to 0.3470  | No           | ns          |    |    |        | B-C |
| Test details                           |  |  | Mean 1     | Mean 2             | Mean Diff.   | SE of diff. | n1 | n2 | t      | DF  |
| CT vs. OBS                             |  |  | 0.6320     | 0.7667             | -0.1347      | 0.08759     | 5  | 6  | 1.537  | 14  |
| CT vs. OBExT                           |  |  | 0.6320     | 0.6467             | -0.01467     | 0.08759     | 5  | 6  | 0.1674 | 14  |
| OBS vs. OBExT                          |  |  | 0.7667     | 0.6467             | 0.1200       | 0.08352     | 6  | 6  | 1.437  | 14  |



### Fig. 3E

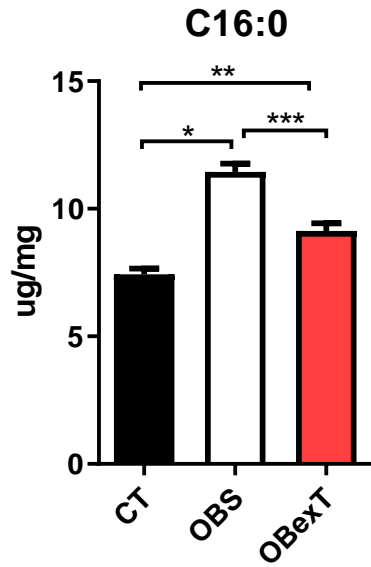

| CT   | OBS   | OBExT | Bonferroni's multiple comparisons test | Mean Diff.    | 95.00% CI of diff. | Significant?      | Summary            |           |           |          |           |
|------|-------|-------|----------------------------------------|---------------|--------------------|-------------------|--------------------|-----------|-----------|----------|-----------|
|      |       |       | CT vs. OBS                             | -3.706        | -5.068 to -2.343   | Yes               | ****               |           |           | A-B      |           |
| 6.90 | 9.62  | 8.75  | CT vs. OBExT                           | -1.436        | -2.798 to -0.07337 | Yes               | *                  |           |           | A-C      |           |
| 7.31 | 11.71 | 9.28  | OBS vs. OBExT                          | 2.270         | 0.9711 to 3.569    | Yes               | ***                |           |           | B-C      |           |
| 7.16 | 12.37 | 8.41  | <b>Test details</b>                    | <b>Mean 1</b> | <b>Mean 2</b>      | <b>Mean Diff.</b> | <b>SE of diff.</b> | <b>n1</b> | <b>n2</b> | <b>t</b> | <b>DF</b> |
| 7.59 | 11.35 | 9.03  | CT vs. OBS                             | 7.436         | 11.14              | -3.706            | 0.5013             | 5         | 6         | 7.393    | 14        |
| 8.22 | 11.41 | 10.17 | CT vs. OBExT                           | 7.436         | 8.872              | -1.436            | 0.5013             | 5         | 6         | 2.864    | 14        |
|      | 10.39 | 7.59  | OBS vs. OBExT                          | 11.14         | 8.872              | 2.270             | 0.4779             | 6         | 6         | 4.750    | 14        |

### Fig. 3F

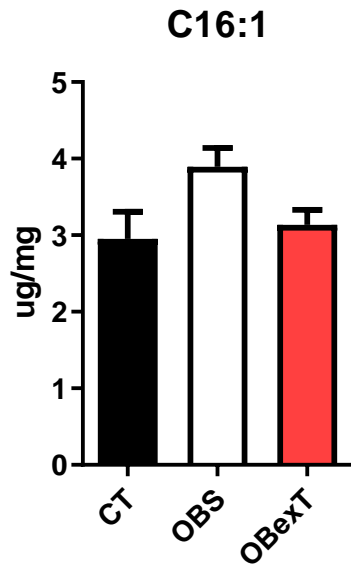

| CT   | OBS  | OBExT | Bonferroni's multiple comparisons test | Mean Diff.    | 95.00% CI of diff. | Significant?      | Summary            |           |           |          |           |
|------|------|-------|----------------------------------------|---------------|--------------------|-------------------|--------------------|-----------|-----------|----------|-----------|
|      |      |       | CT vs. OBS                             | -0.9153       | -2.053 to 0.2227   | No                | ns                 |           |           | A-B      |           |
| 3.97 | 2.89 | 2.67  | CT vs. OBExT                           | -0.1553       | -1.293 to 0.9827   | No                | ns                 |           |           | A-C      |           |
| 1.49 | 4.75 | 3.08  | OBS vs. OBExT                          | 0.7600        | -0.3251 to 1.845   | No                | ns                 |           |           | B-C      |           |
| 3.31 | 4.03 | 3.99  | <b>Test details</b>                    | <b>Mean 1</b> | <b>Mean 2</b>      | <b>Mean Diff.</b> | <b>SE of diff.</b> | <b>n1</b> | <b>n2</b> | <b>t</b> | <b>DF</b> |
| 2.62 | 3.77 | 2.82  | CT vs. OBS                             | 2.978         | 3.893              | -0.9153           | 0.4188             | 5         | 6         | 2.186    | 14        |
| 3.50 | 3.90 | 3.39  | CT vs. OBExT                           | 2.978         | 3.133              | -0.1553           | 0.4188             | 5         | 6         | 0.3709   | 14        |
|      | 4.02 | 2.85  | OBS vs. OBExT                          | 3.893         | 3.133              | 0.7600            | 0.3993             | 6         | 6         | 1.903    | 14        |



### Fig. 3I

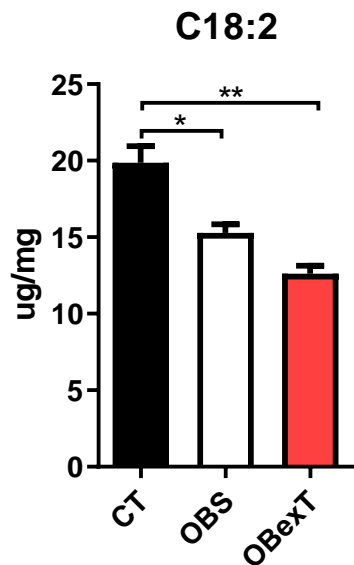

| CT    | OBS   | OBexT | Bonferroni's multiple comparisons test | Mean Diff.    | 95.00% CI of diff. | Significant?      | Summary            |           |           |          |           |
|-------|-------|-------|----------------------------------------|---------------|--------------------|-------------------|--------------------|-----------|-----------|----------|-----------|
|       |       |       | CT vs. OBS                             | 5.122         | 2.226 to 8.018     | Yes               | ***                |           |           | A-B      |           |
| 24.28 | 13.13 | 11.90 | CT vs. OBexT                           | 7.790         | 4.894 to 10.69     | Yes               | ****               |           |           | A-C      |           |
| 20.98 | 17.12 | 13.73 | OBS vs. OBexT                          | 2.668         | -0.09329 to 5.430  | No                | ns                 |           |           | B-C      |           |
| 18.03 | 15.02 | 12.83 | <b>Test details</b>                    | <b>Mean 1</b> | <b>Mean 2</b>      | <b>Mean Diff.</b> | <b>SE of diff.</b> | <b>n1</b> | <b>n2</b> | <b>t</b> | <b>DF</b> |
| 18.20 | 15.24 | 11.40 | CT vs. OBS                             | 20.40         | 15.28              | 5.122             | 1.066              | 5         | 6         | 4.806    | 14        |
| 20.52 | 16.30 | 14.45 | CT vs. OBexT                           | 20.40         | 12.61              | 7.790             | 1.066              | 5         | 6         | 7.310    | 14        |
|       | 14.87 | 11.36 | OBS vs. OBexT                          | 15.28         | 12.61              | 2.668             | 1.016              | 6         | 6         | 2.626    | 14        |

### Fig. 3J

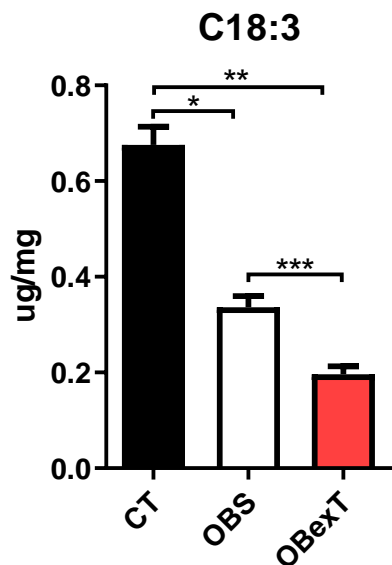

| CT   | OBS  | OBexT | Bonferroni's multiple comparisons test | Mean Diff.    | 95.00% CI of diff. | Significant?      | Summary            |           |           |          |           |
|------|------|-------|----------------------------------------|---------------|--------------------|-------------------|--------------------|-----------|-----------|----------|-----------|
|      |      |       | CT vs. OBS                             | 0.3393        | 0.2392 to 0.4394   | Yes               | ****               |           |           | A-B      |           |
| 0.58 | 0.25 | 0.15  | CT vs. OBexT                           | 0.4793        | 0.3792 to 0.5794   | Yes               | ****               |           |           | A-C      |           |
| 0.79 | 0.42 | 0.15  | OBS vs. OBexT                          | 0.1400        | 0.04457 to 0.2354  | Yes               | **                 |           |           | B-C      |           |
| 0.63 | 0.35 | 0.20  | <b>Test details</b>                    | <b>Mean 1</b> | <b>Mean 2</b>      | <b>Mean Diff.</b> | <b>SE of diff.</b> | <b>n1</b> | <b>n2</b> | <b>t</b> | <b>DF</b> |
| 0.73 | 0.31 | 0.23  | CT vs. OBS                             | 0.6760        | 0.3367             | 0.3393            | 0.03683            | 5         | 6         | 9.214    | 14        |
| 0.65 | 0.34 | 0.20  | CT vs. OBexT                           | 0.6760        | 0.1967             | 0.4793            | 0.03683            | 5         | 6         | 13.02    | 14        |
|      | 0.35 | 0.25  | OBS vs. OBexT                          | 0.3367        | 0.1967             | 0.1400            | 0.03511            | 6         | 6         | 3.987    | 14        |

**Fig. 3K**

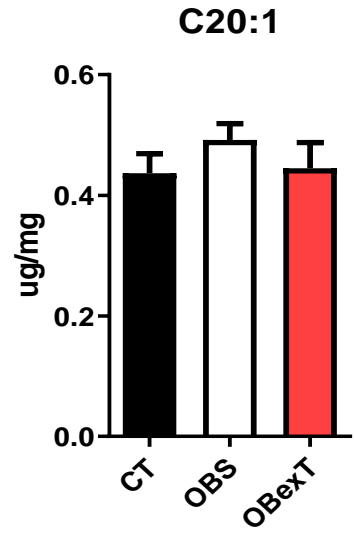

| CT   | OBS  | OBexT |
|------|------|-------|
| 0.48 | 0.44 | 0.43  |
| 0.40 | 0.54 | 0.61  |
| 0.46 | 0.45 | 0.43  |
| 0.35 | 0.49 | 0.50  |
| 0.37 | 0.60 | 0.40  |
|      | 0.43 | 0.30  |

| Bonferroni's multiple comparisons test |  |  |  | Mean Diff. | 95.00% CI of diff. | Significant? | Summary     |    |    |        |    |
|----------------------------------------|--|--|--|------------|--------------------|--------------|-------------|----|----|--------|----|
| CT vs. OBS                             |  |  |  | -0.07967   | -0.2107 to 0.05133 | No           | ns          |    |    | A-B    |    |
| CT vs. OBexT                           |  |  |  | -0.03300   | -0.1640 to 0.09800 | No           | ns          |    |    | A-C    |    |
| OBS vs. OBexT                          |  |  |  | 0.04667    | -0.07824 to 0.1716 | No           | ns          |    |    | B-C    |    |
| Test details                           |  |  |  | Mean 1     | Mean 2             | Mean Diff.   | SE of diff. | n1 | n2 | t      | DF |
| CT vs. OBS                             |  |  |  | 0.4120     | 0.4917             | -0.07967     | 0.04820     | 5  | 6  | 1.653  | 14 |
| CT vs. OBexT                           |  |  |  | 0.4120     | 0.4450             | -0.03300     | 0.04820     | 5  | 6  | 0.6846 | 14 |
| OBS vs. OBexT                          |  |  |  | 0.4917     | 0.4450             | 0.04667      | 0.04596     | 6  | 6  | 1.015  | 14 |

**Fig. 4A and B**

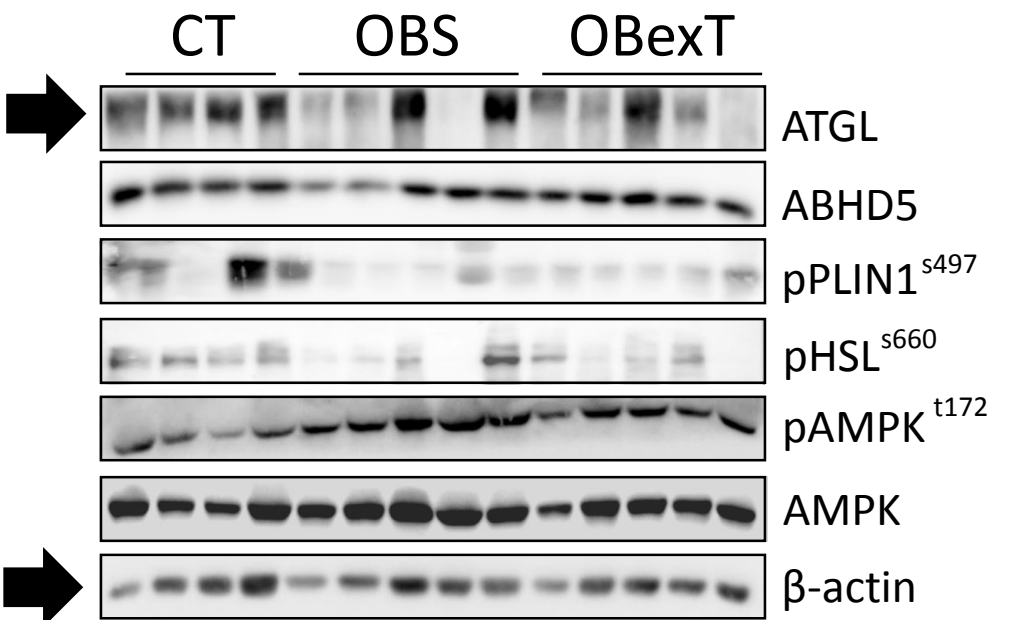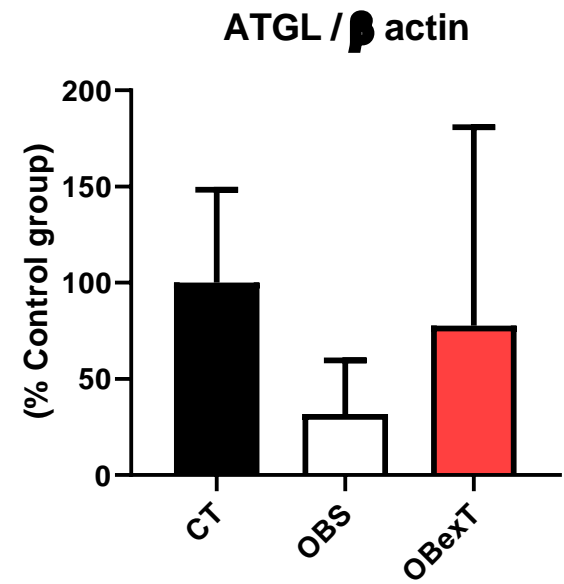

|  | CT      | OBS    | OBexT   |
|--|---------|--------|---------|
|  | 168.657 | 76.818 | 49.914  |
|  | 96.966  | 26.265 | 10.153  |
|  | 59.015  | 0.011  | 254.391 |
|  | 75.362  | 29.220 | 73.864  |
|  |         | 26.695 | 0.000   |

| Tukey's multiple comparisons test | Mean Diff. | 95.00% CI of diff. | Significant? | Summary     | Adjusted P Value |     |        |    |
|-----------------------------------|------------|--------------------|--------------|-------------|------------------|-----|--------|----|
| CT vs. OBS                        | 68.20      | -57.23 to 193.6    | No           | ns          | 0.3422           | A-B |        |    |
| CT vs. OBexT                      | 22.34      | -103.1 to 147.8    | No           | ns          | 0.8816           | A-C |        |    |
| OBS vs. OBexT                     | -45.86     | -164.1 to 72.39    | No           | ns          | 0.5641           | B-C |        |    |
| Test details                      | Mean 1     | Mean 2             | Mean Diff.   | SE of diff. | n1               | n2  | q      | DF |
| CT vs. OBS                        | 100.0      | 31.80              | 68.20        | 46.44       | 4                | 5   | 2.077  | 11 |
| CT vs. OBexT                      | 100.0      | 77.66              | 22.34        | 46.44       | 4                | 5   | 0.6802 | 11 |
| OBS vs. OBexT                     | 31.80      | 77.66              | -45.86       | 43.78       | 5                | 5   | 1.481  | 11 |

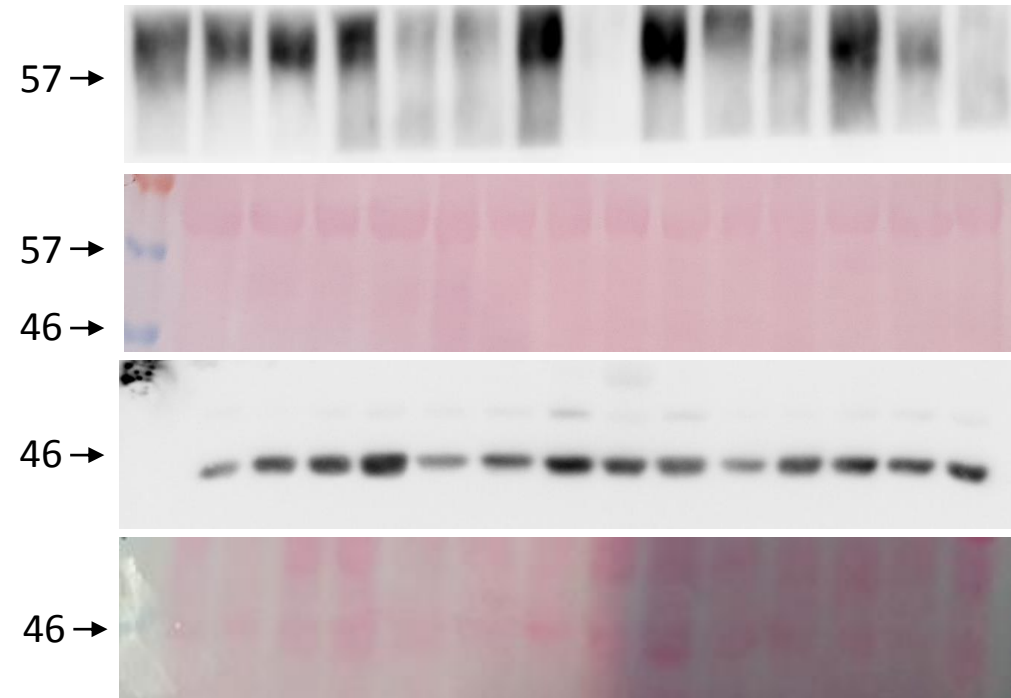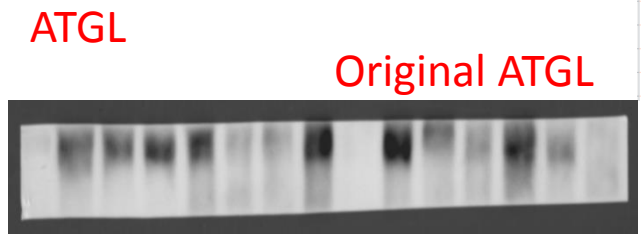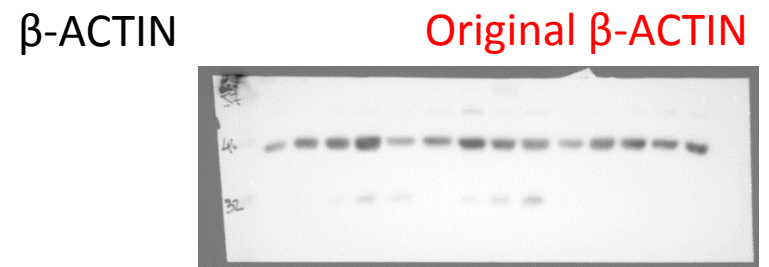

**Fig. 4A and C**

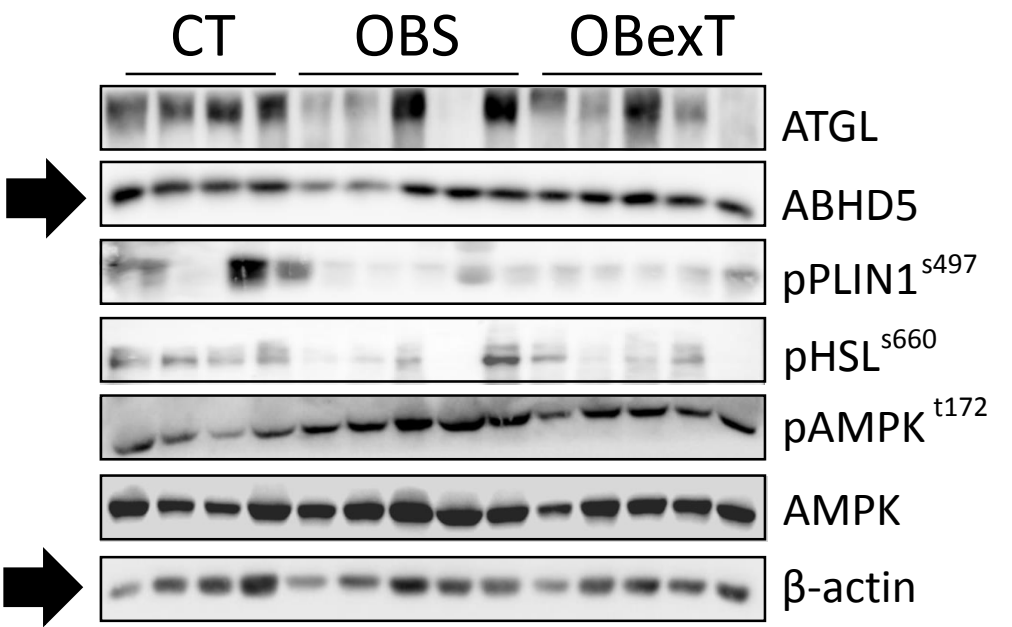

**ABHD5 / β actin**

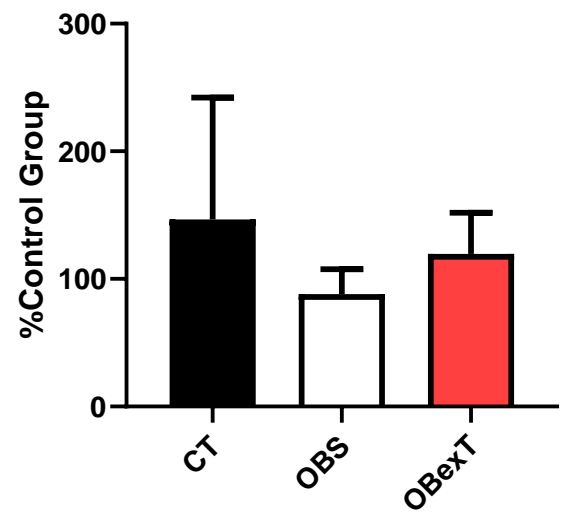

| CT      | OBS     | OBexT   |
|---------|---------|---------|
| 286.414 | 97.921  | 175.489 |
| 127.103 | 63.484  | 107.052 |
| 97.016  | 71.115  | 113.194 |
| 75.881  | 100.662 | 110.837 |
|         | 107.156 | 91.971  |

| Tukey's multiple comparisons test | Mean Diff. | 95.00% CI of diff. | Significant? | Summary | Adjusted P Value |  |       |  |
|-----------------------------------|------------|--------------------|--------------|---------|------------------|--|-------|--|
| CT vs. OBS                        | 58.54      | -40.79 to 157.9    | No           | ns      | 0.2896           |  | AC-AD |  |
| CT vs. OBexT                      | 26.89      | -72.43 to 128.2    | No           | ns      | 0.7506           |  | AC-AE |  |
| OBS vs. OBexT                     | -31.64     | -125.3 to 62.01    | No           | ns      | 0.6439           |  | AD-AE |  |

  

| Test details  | Mean 1 | Mean 2 | Mean Diff. | SE of diff. | n1 | n2 | q     | DF |
|---------------|--------|--------|------------|-------------|----|----|-------|----|
| CT vs. OBS    | 146.6  | 88.07  | 58.54      | 36.78       | 4  | 5  | 2.251 | 11 |
| CT vs. OBexT  | 146.6  | 119.7  | 26.89      | 36.78       | 4  | 5  | 1.034 | 11 |
| OBS vs. OBexT | 88.07  | 119.7  | -31.64     | 34.67       | 5  | 5  | 1.291 | 11 |

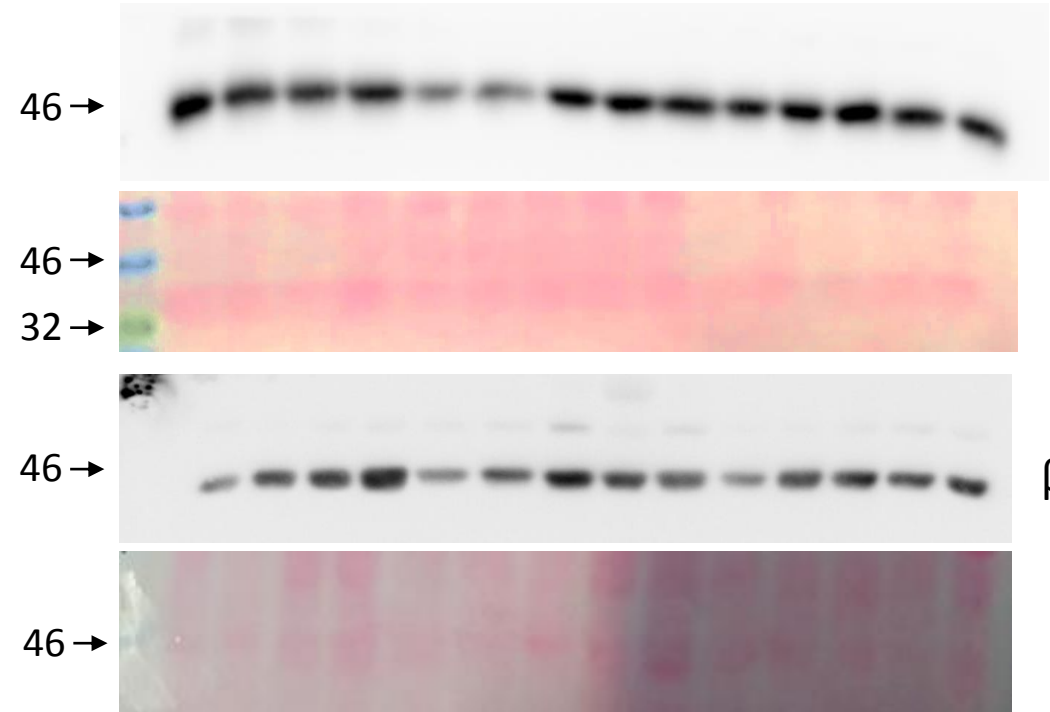

**ABHD5**

**β-ACTIN**

**Original ABHD5**

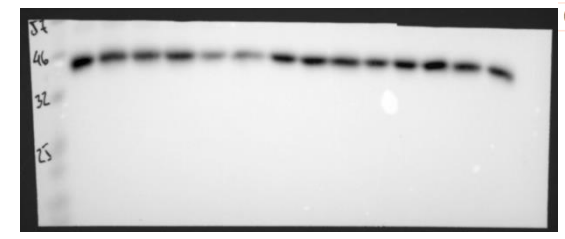

**Fig. 4A and D**

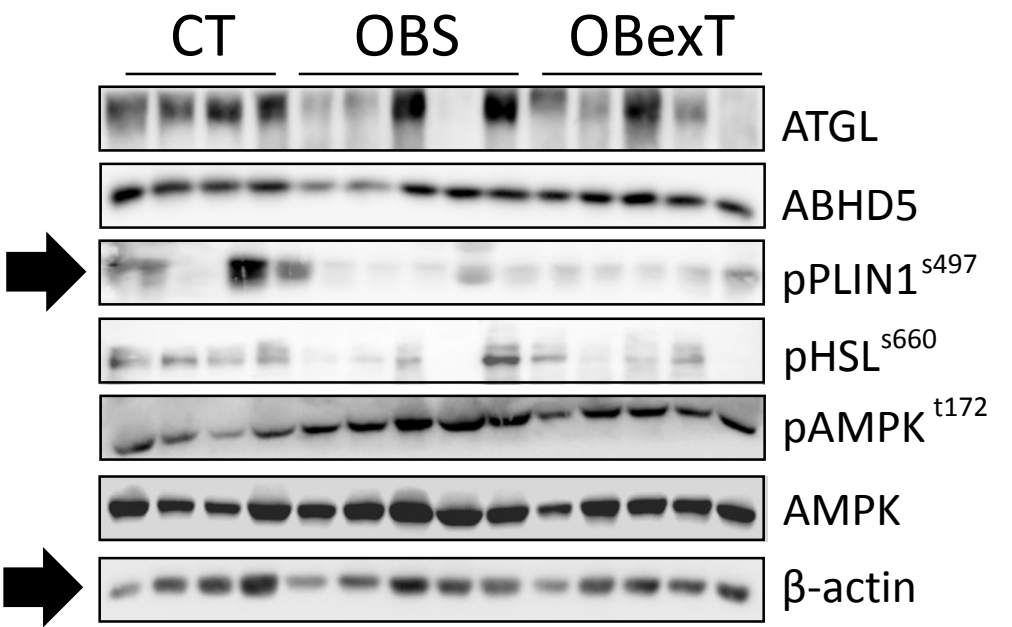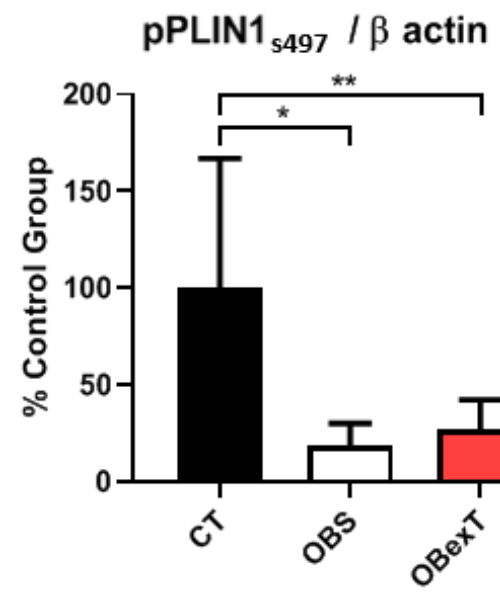

| CT      | OBS    | OBexT  |
|---------|--------|--------|
| 154.017 | 23.320 | 36.292 |
| 27.239  | 8.311  | 15.089 |
| 159.723 | 7.577  | 12.076 |
| 59.021  | 35.277 | 24.623 |
|         | 19.047 | 48.496 |

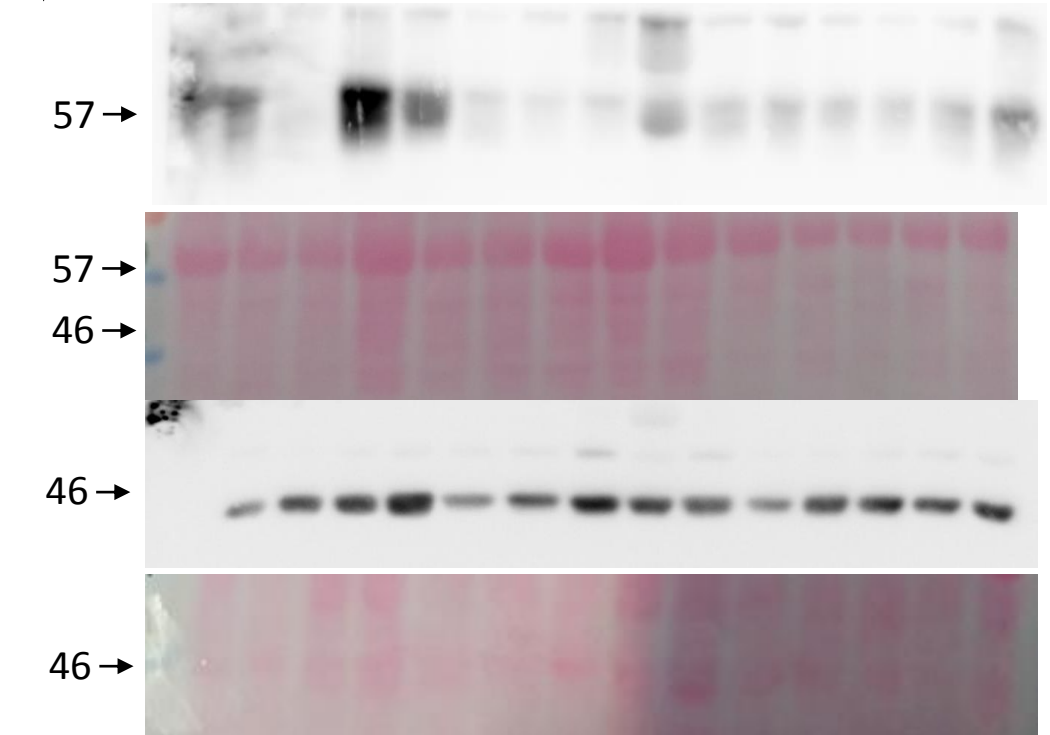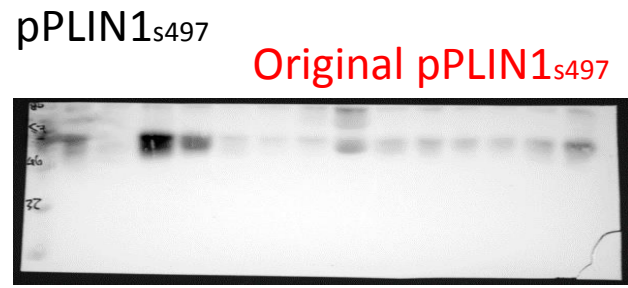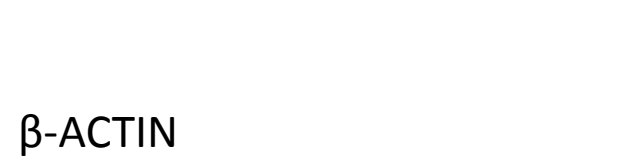

| Tukey's multiple comparisons test | Mean Diff. | 95.00% CI of diff. | Significant? | Summary     | Adjusted P Value |       |        |    |  |
|-----------------------------------|------------|--------------------|--------------|-------------|------------------|-------|--------|----|--|
| CT vs. OBS                        | 81.29      | 14.60 to 148.0     | Yes          | *           | 0.0181           | AG-AH |        |    |  |
| CT vs. OBexT                      | 72.68      | 5.994 to 139.4     | Yes          | *           | 0.0330           | AG-AI |        |    |  |
| OBS vs. OBexT                     | -8.609     | -71.49 to 54.27    | No           | ns          | 0.9279           | AH-AI |        |    |  |
| Test details                      | Mean 1     | Mean 2             | Mean Diff.   | SE of diff. | n1               | n2    | q      | DF |  |
| CT vs. OBS                        | 100.0      | 18.71              | 81.29        | 24.69       | 4                | 5     | 4.656  | 11 |  |
| CT vs. OBexT                      | 100.0      | 27.32              | 72.68        | 24.69       | 4                | 5     | 4.163  | 11 |  |
| OBS vs. OBexT                     | 18.71      | 27.32              | -8.609       | 23.28       | 5                | 5     | 0.5230 | 11 |  |

**Fig. 4A and E**

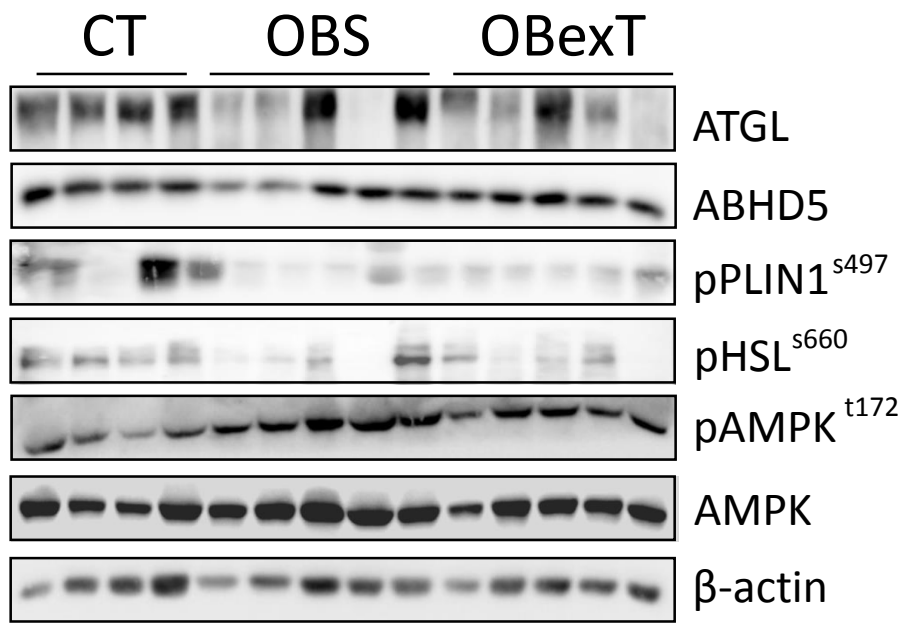

**pHSL<sup>s660</sup> / β-actin**

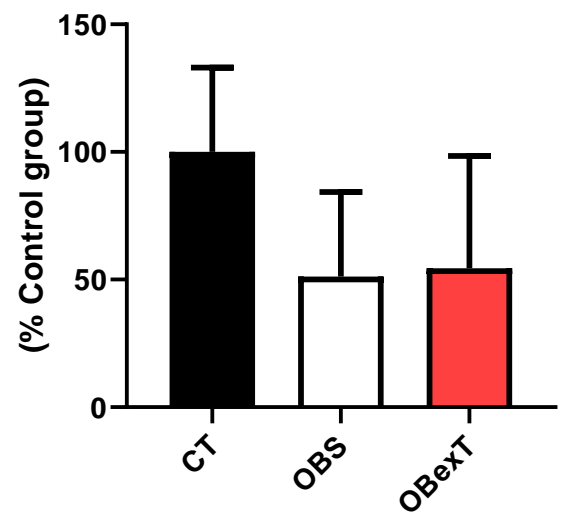

|  | CT      | OBS    | OBexT   |
|--|---------|--------|---------|
|  | 120.165 | 75.730 | 29.087  |
|  | 135.266 | 35.280 | 43.094  |
|  | 79.378  | 30.060 | 129.401 |
|  | 65.191  | 96.175 | 52.923  |
|  |         | 18.911 | 17.758  |

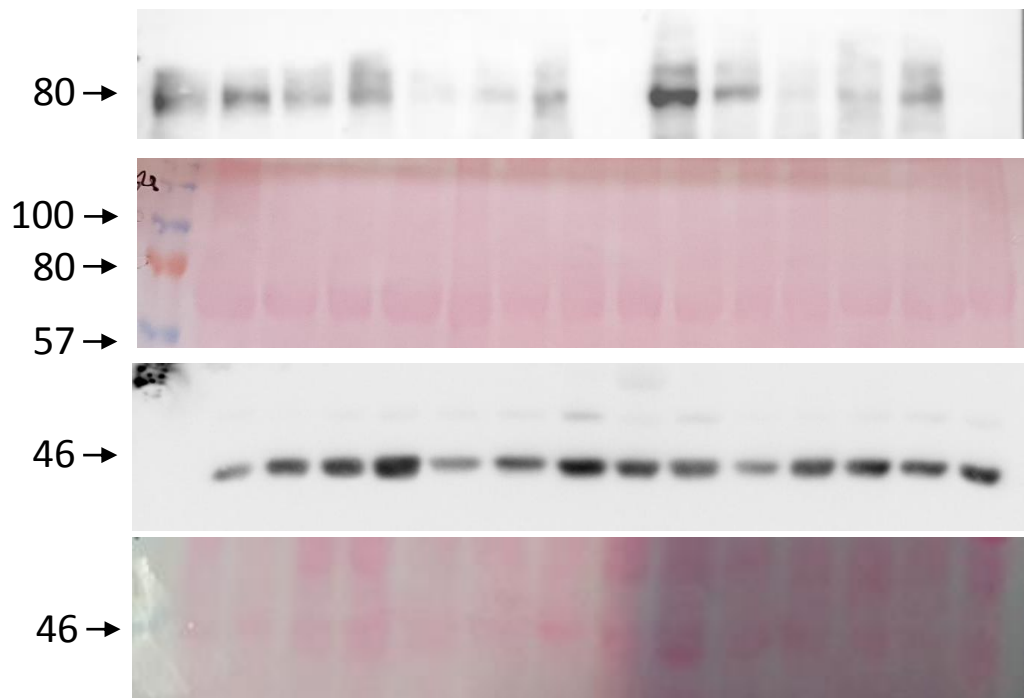

**pHSL<sub>s660</sub>**

**Original pHSL<sub>s660</sub>**

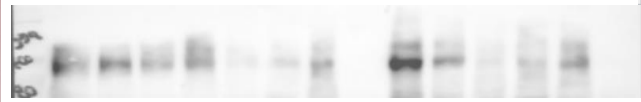

**β-ACTIN**

| Tukey's multiple comparisons test | Mean Diff. | 95.00% CI of diff. | Significant? | Summary     | Adjusted P Value |     |        |    |
|-----------------------------------|------------|--------------------|--------------|-------------|------------------|-----|--------|----|
| CT vs. OBS                        | 48.77      | -19.01 to 116.5    | No           | ns          | 0.1727           | A-B |        |    |
| CT vs. OBexT                      | 45.55      | -22.23 to 113.3    | No           | ns          | 0.2099           | A-C |        |    |
| OBS vs. OBexT                     | -3.221     | -67.12 to 60.68    | No           | ns          | 0.9898           | B-C |        |    |
| Test details                      | Mean 1     | Mean 2             | Mean Diff.   | SE of diff. | n1               | n2  | q      | DF |
| CT vs. OBS                        | 100.0      | 51.23              | 48.77        | 25.09       | 4                | 5   | 2.748  | 11 |
| CT vs. OBexT                      | 100.0      | 54.45              | 45.55        | 25.09       | 4                | 5   | 2.567  | 11 |
| OBS vs. OBexT                     | 51.23      | 54.45              | -3.221       | 23.66       | 5                | 5   | 0.1926 | 11 |



**Fig. 4A and F**

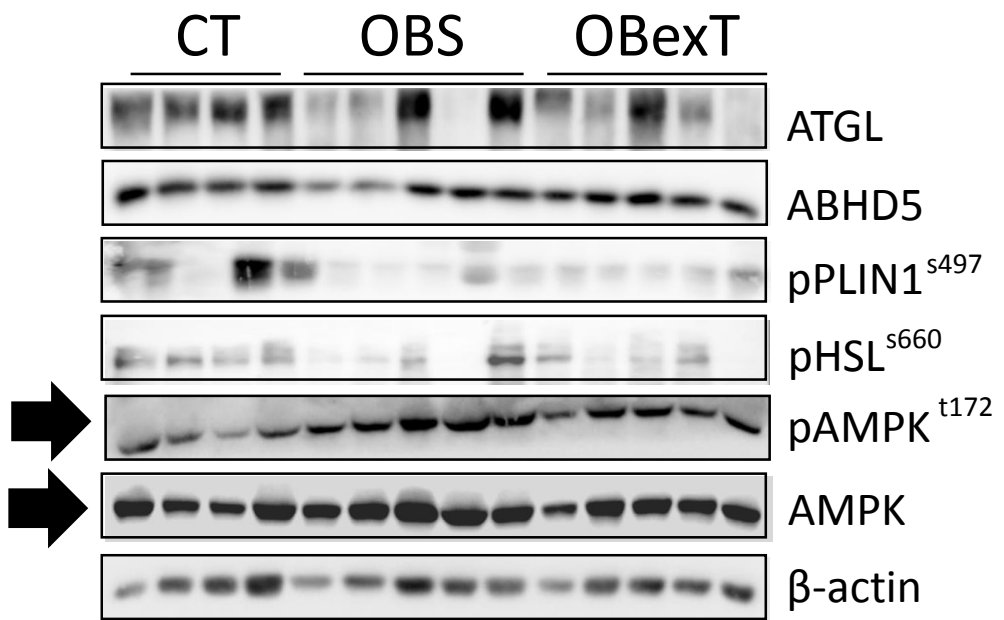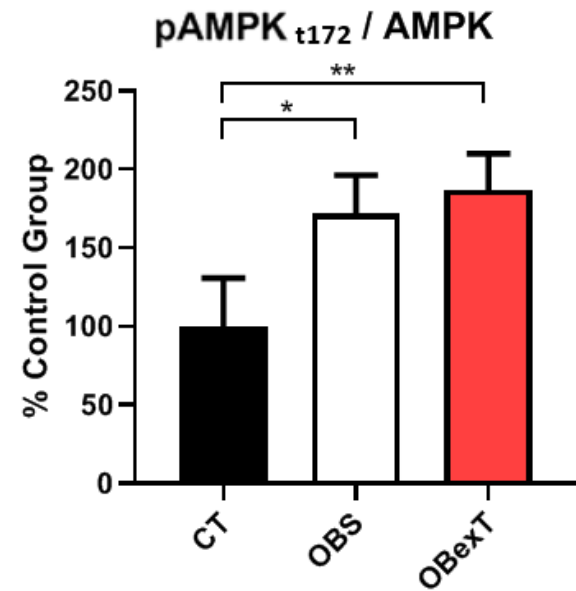

| CT      | OBS     | OBexT   |
|---------|---------|---------|
| 117.204 | 167.272 | 213.282 |
| 125.924 | 141.702 | 195.062 |
| 56.939  | 162.231 | 200.113 |
| 99.933  | 178.849 | 158.322 |
|         | 208.327 | 167.074 |

| Tukey's multiple comparisons test | Mean Diff. | 95.00% CI of diff. | Significant? | Summary     | Adjusted P Value |       |       |    |
|-----------------------------------|------------|--------------------|--------------|-------------|------------------|-------|-------|----|
| CT vs. OBS                        | -54.86     | -89.86 to -19.86   | Yes          | **          | 0.0037           | AK-AL |       |    |
| CT vs. OBexT                      | -88.48     | -103.5 to -33.47   | Yes          | ***         | 0.0007           | AK-AM |       |    |
| OBS vs. OBexT                     | -13.62     | -46.62 to 19.38    | No           | ns          | 0.5254           | AL-AM |       |    |
| Test details                      | Mean 1     | Mean 2             | Mean Diff.   | SE of diff. | n1               | n2    | q     | DF |
| CT vs. OBS                        | 100.0      | 154.9              | -54.86       | 12.96       | 4                | 5     | 5.987 | 11 |
| CT vs. OBexT                      | 100.0      | 168.5              | -88.48       | 12.96       | 4                | 5     | 7.473 | 11 |
| OBS vs. OBexT                     | 154.9      | 168.5              | -13.62       | 12.22       | 5                | 5     | 1.576 | 11 |

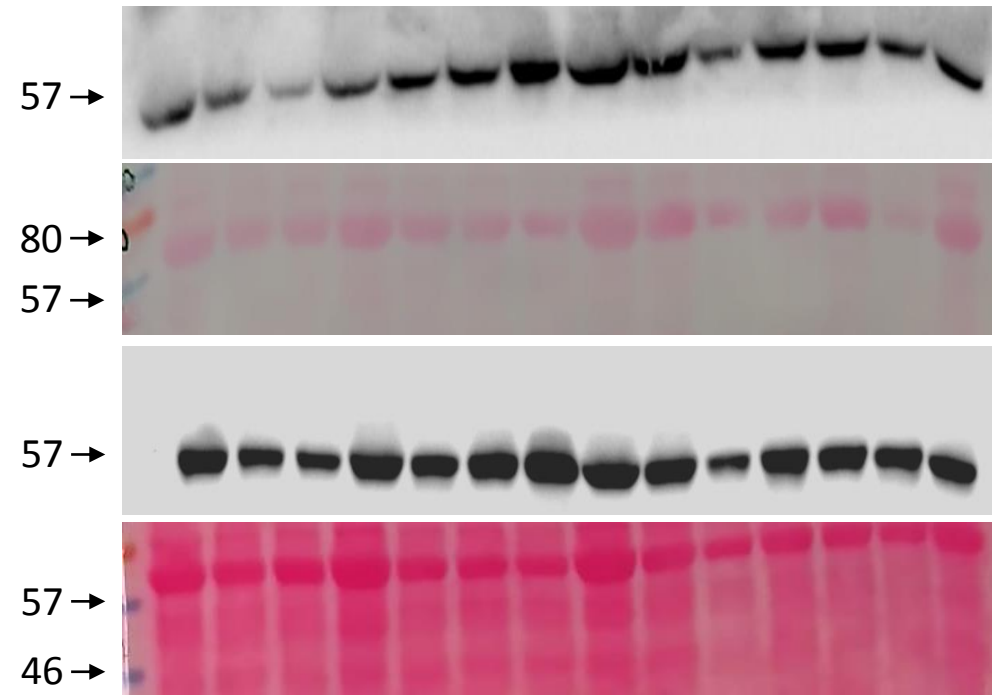

pAMPK<sub>t172</sub>

Original pAMPK<sub>t172</sub>

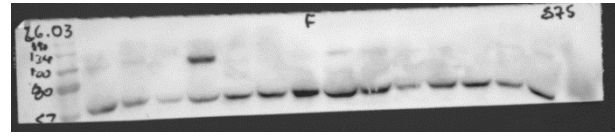

AMPK

Original AMPK

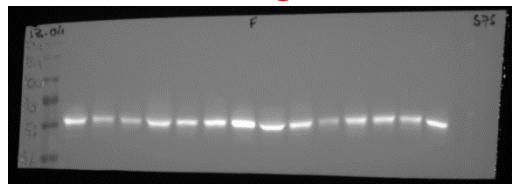

**Fig. 5A and B**

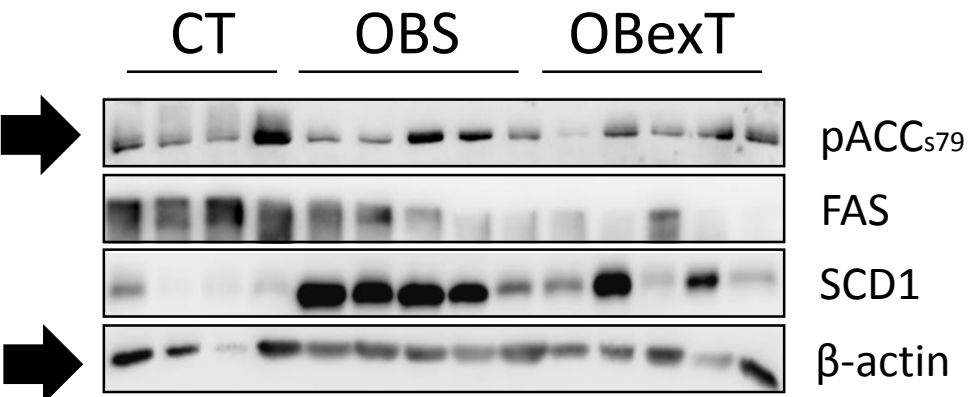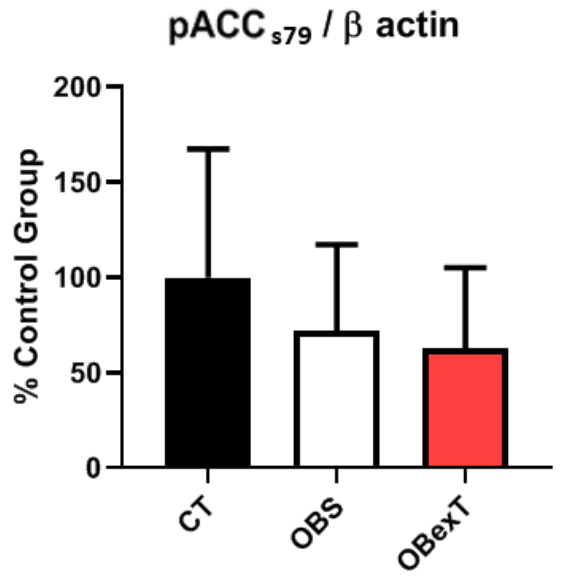

| CT      | OBS     | OBexT   |
|---------|---------|---------|
| 51.686  | 43.432  | 15.943  |
| 51.221  | 32.865  | 88.325  |
| 194.377 | 119.242 | 31.602  |
| 102.715 | 123.419 | 120.740 |
|         | 41.439  | 56.501  |

| Tukey's multiple comparisons test | Mean Diff. | 95.00% CI of diff. | Significant? | Summary | Adjusted P Value |     |  |  |
|-----------------------------------|------------|--------------------|--------------|---------|------------------|-----|--|--|
| CT vs. OBS                        | 27.92      | -65.11 to 121.0    | No           | ns      | 0.7045           |     |  |  |
| CT vs. OBexT                      | 37.38      | -55.65 to 130.4    | No           | ns      | 0.5422           | Q-R |  |  |
| OBS vs. OBexT                     | 9.457      | -78.25 to 97.17    | No           | ns      | 0.9545           | R-S |  |  |

  

| Test details  | Mean 1 | Mean 2 | Mean Diff. | SE of diff. | n1 | n2 | q      | DF |
|---------------|--------|--------|------------|-------------|----|----|--------|----|
| CT vs. OBS    | 100.0  | 72.08  | 27.92      | 34.45       | 4  | 5  | 1.146  | 11 |
| CT vs. OBexT  | 100.0  | 62.62  | 37.38      | 34.45       | 4  | 5  | 1.535  | 11 |
| OBS vs. OBexT | 72.08  | 62.62  | 9.457      | 32.48       | 5  | 5  | 0.4118 | 11 |

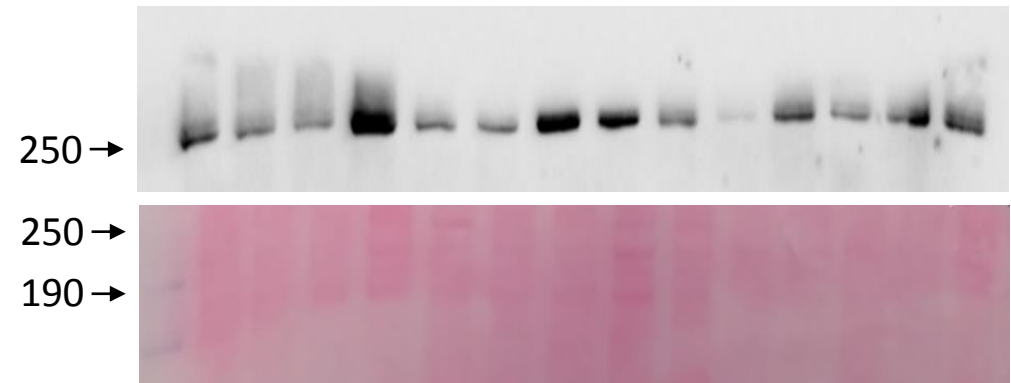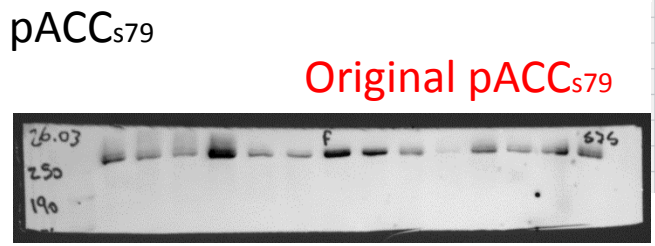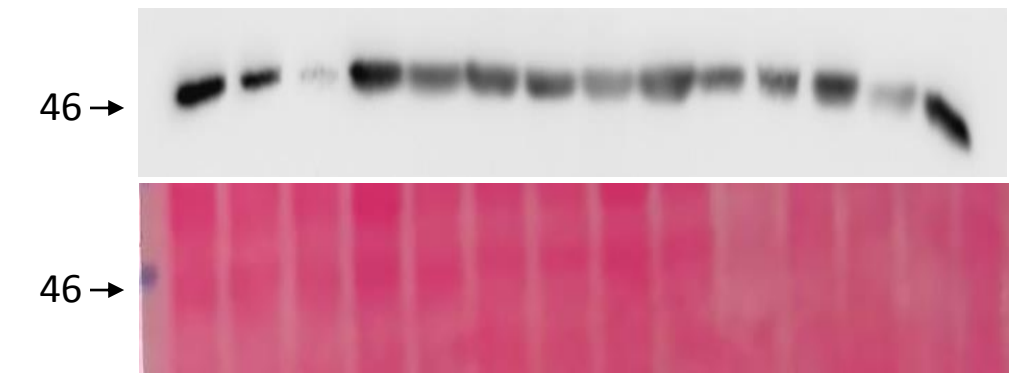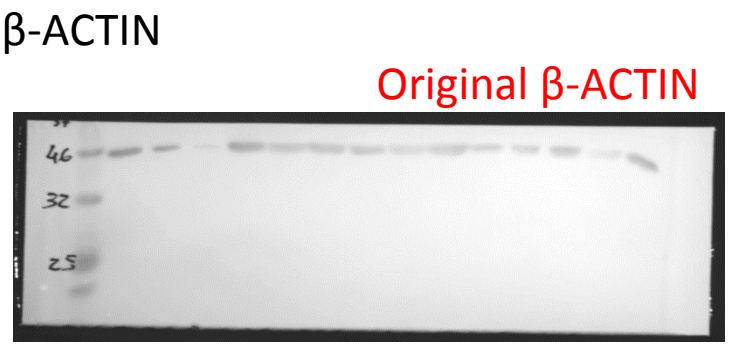

**Fig. 5A and C**

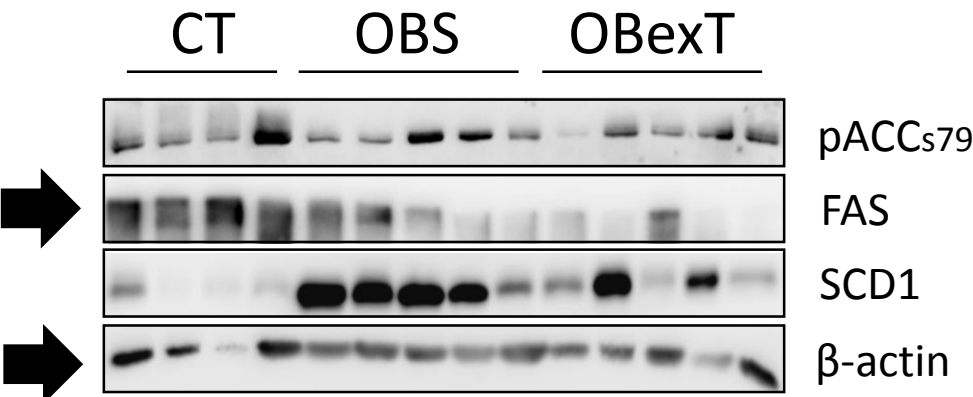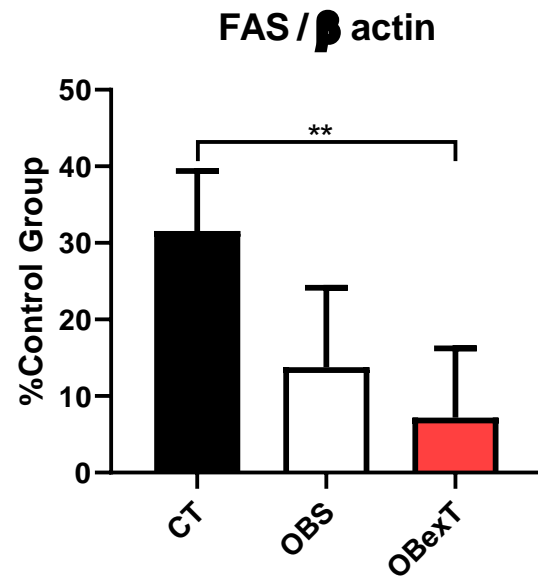

|  | CT       | OBS    | OBexT  |
|--|----------|--------|--------|
|  | 29.089   | 25.680 | 8.538  |
|  | 40.314   | 23.495 | 3.271  |
|  | 305.311* | 11.580 | 22.310 |
|  | 25.286   | 4.486  | 1.914  |
|  |          | 3.513  | 0.000  |

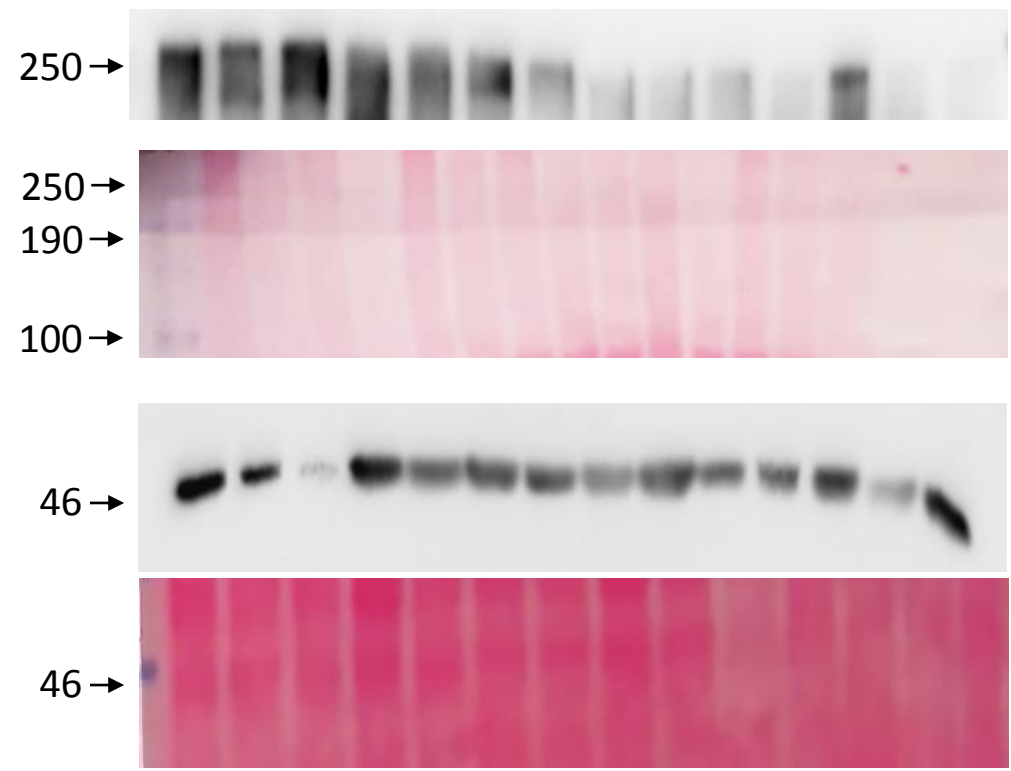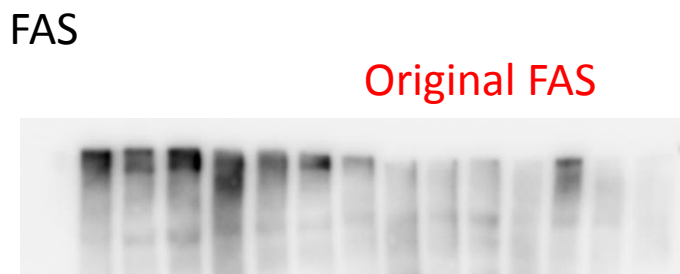

| Tukey's multiple comparisons test | Mean Diff. | 95.00% CI of diff. | Significant? | Summary | Adjusted P Value |     |  |  |
|-----------------------------------|------------|--------------------|--------------|---------|------------------|-----|--|--|
| CT vs. OBS                        | 17.81      | -0.9683 to 36.59   | No           | ns      | 0.0630           | U-V |  |  |
| CT vs. OBexT                      | 24.36      | 5.576 to 43.14     | Yes          | *       | 0.0132           | U-W |  |  |
| OBS vs. OBexT                     | 6.544      | -9.720 to 22.81    | No           | ns      | 0.5337           | V-W |  |  |

  

| Test details  | Mean 1 | Mean 2 | Mean Diff. | SE of diff. | n1 | n2 | q     | DF |
|---------------|--------|--------|------------|-------------|----|----|-------|----|
| CT vs. OBS    | 31.56  | 13.75  | 17.81      | 6.851       | 3  | 5  | 3.677 | 10 |
| CT vs. OBexT  | 31.56  | 7.207  | 24.36      | 6.851       | 3  | 5  | 5.028 | 10 |
| OBS vs. OBexT | 13.75  | 7.207  | 6.544      | 5.933       | 5  | 5  | 1.560 | 10 |

| Cleaned data |    | A       | B | C | D | E | F | G |
|--------------|----|---------|---|---|---|---|---|---|
|              |    | CT      |   |   |   |   |   |   |
| 1            | #3 | 305.311 |   |   |   |   |   |   |

**Fig. 5A and D**

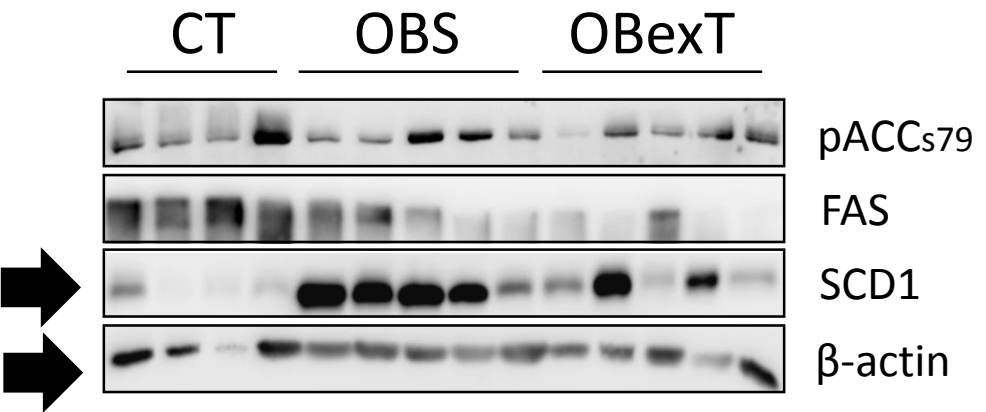

**SCD1 / β actin**

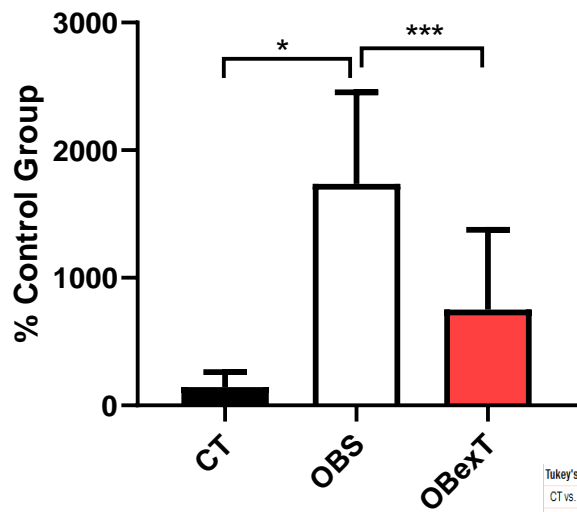

| CT      | OBS      | OBexT    |
|---------|----------|----------|
| 277.568 | 2310.906 | 641.678  |
| 22.580  | 1621.000 | 1251.234 |
| 200.444 | 2051.606 | 171.162  |
| 76.976  | 2161.602 | 1532.746 |
|         | 540.681  | 162.530  |

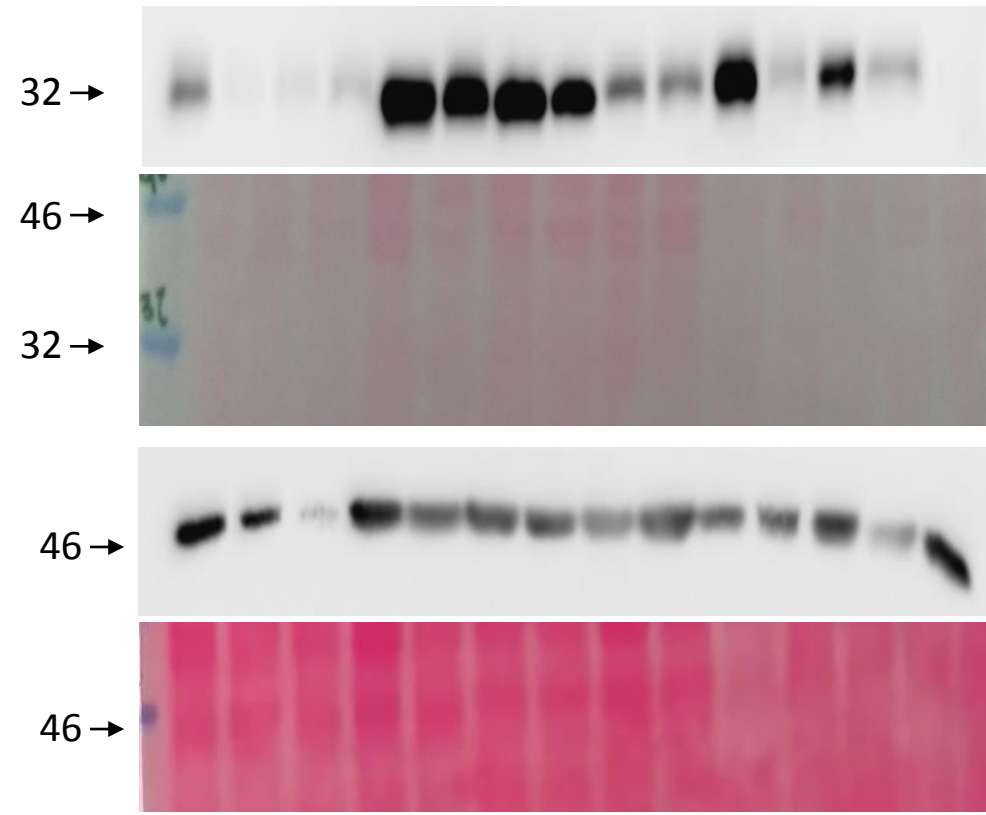

SCD1

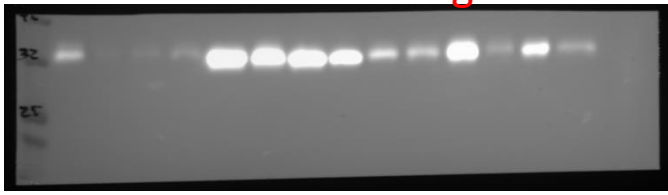

β-ACTIN

| Tukey's multiple comparisons test | Mean Diff. | 95.00% CI of diff. | Significant? | Summary     | Adjusted P Value |      |       |    |
|-----------------------------------|------------|--------------------|--------------|-------------|------------------|------|-------|----|
| CT vs. OBS                        | -1593      | -2639 to -549.2    | Yes          | **          | 0.0044           | Y-Z  |       |    |
| CT vs. OBexT                      | -607.5     | -1651 to 436.1     | No           | ns          | 0.2975           | Y-AA |       |    |
| OBS vs. OBexT                     | 985.3      | 1.408 to 1969      | Yes          | *           | 0.0497           | Z-AA |       |    |
| Test details                      | Mean 1     | Mean 2             | Mean Diff.   | SE of diff. | n1               | n2   | q     | DF |
| CT vs. OBS                        | 144.4      | 1737               | -1593        | 386.4       | 4                | 5    | 5.830 | 11 |
| CT vs. OBexT                      | 144.4      | 751.9              | -607.5       | 386.4       | 4                | 5    | 2.223 | 11 |
| OBS vs. OBexT                     | 1737       | 751.9              | 985.3        | 364.3       | 5                | 5    | 3.825 | 11 |

**Fig. 6A and B**

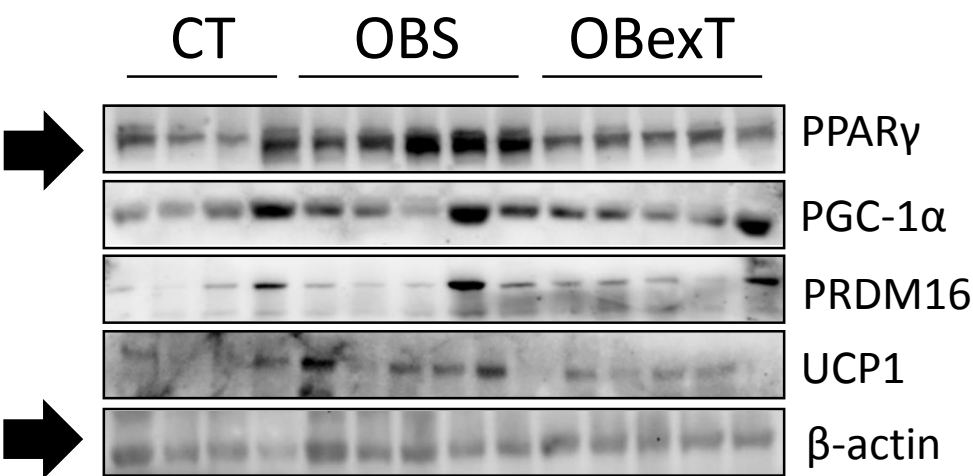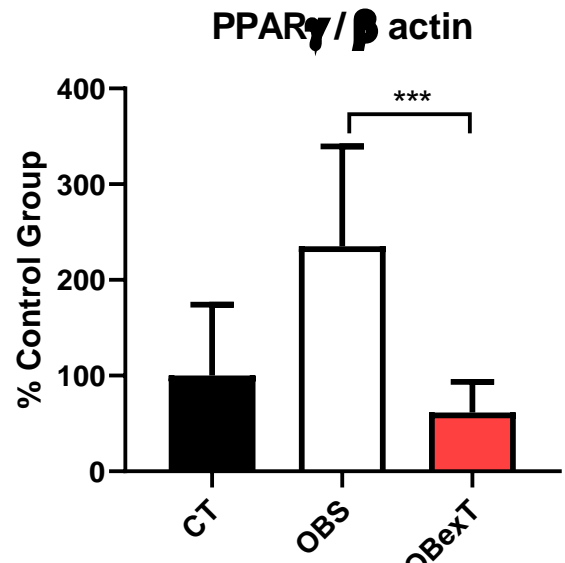

| CT           | OBS         | OBexT        |
|--------------|-------------|--------------|
| 128.91390000 | 320.5236000 | 116.05030000 |
| 64.093870000 | 79.47672000 | 43.291160000 |
| 18.799300000 | 340.0244000 | 43.124690000 |
| 188.19300000 | 207.4567000 | 41.123210000 |
|              | 229.0869000 | 63.857070000 |

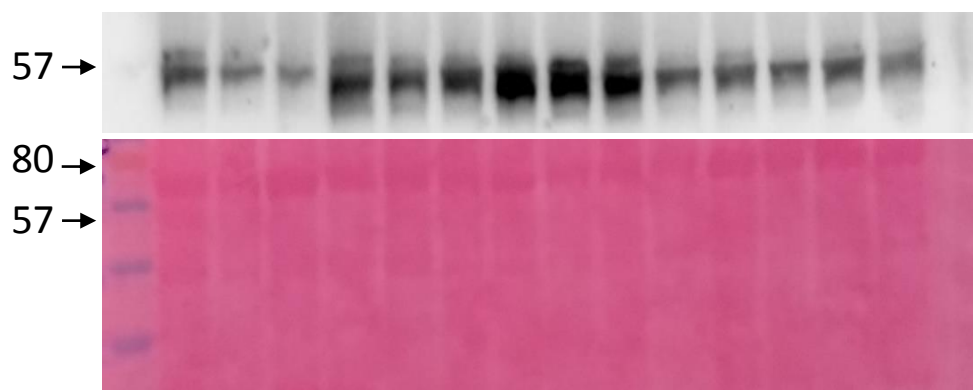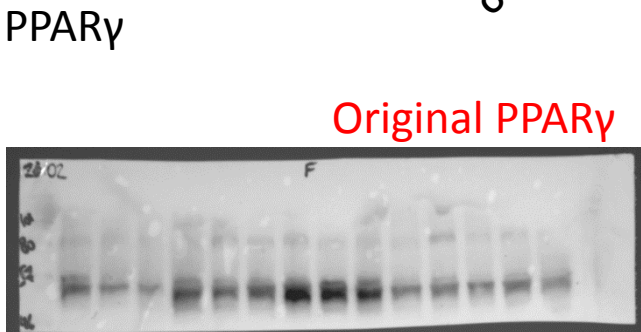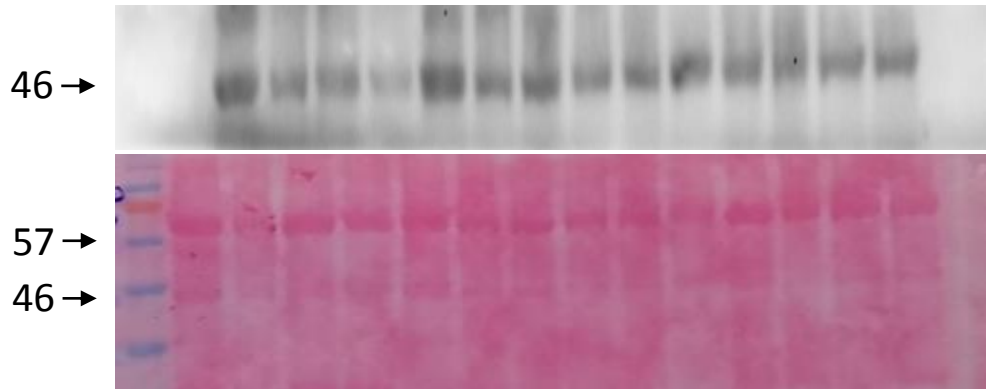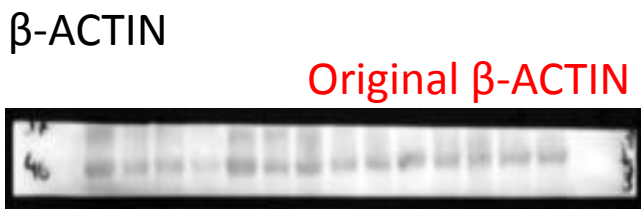

| Tukey's multiple comparisons test | Mean Diff. | 95.00% CI of diff. | Significant? | Summary     | Adjusted P Value |     |       |    |
|-----------------------------------|------------|--------------------|--------------|-------------|------------------|-----|-------|----|
| CT vs. OBS                        | -135.3     | -273.4 to 2.763    | No           | ns          | 0.0548           | A-B |       |    |
| CT vs. OBexT                      | 38.51      | -99.57 to 176.6    | No           | ns          | 0.7379           | A-C |       |    |
| OBS vs. OBexT                     | 173.8      | 43.84 to 304.0     | Yes          | *           | 0.0106           | B-C |       |    |
| Test details                      | Mean 1     | Mean 2             | Mean Diff.   | SE of diff. | n1               | n2  | q     | DF |
| CT vs. OBS                        | 100.0      | 235.3              | -135.3       | 51.12       | 4                | 5   | 3.743 | 11 |
| CT vs. OBexT                      | 100.0      | 61.49              | 38.51        | 51.12       | 4                | 5   | 1.065 | 11 |
| OBS vs. OBexT                     | 235.3      | 61.49              | 173.8        | 48.20       | 5                | 5   | 5.100 | 11 |



**Fig. 6A and C**

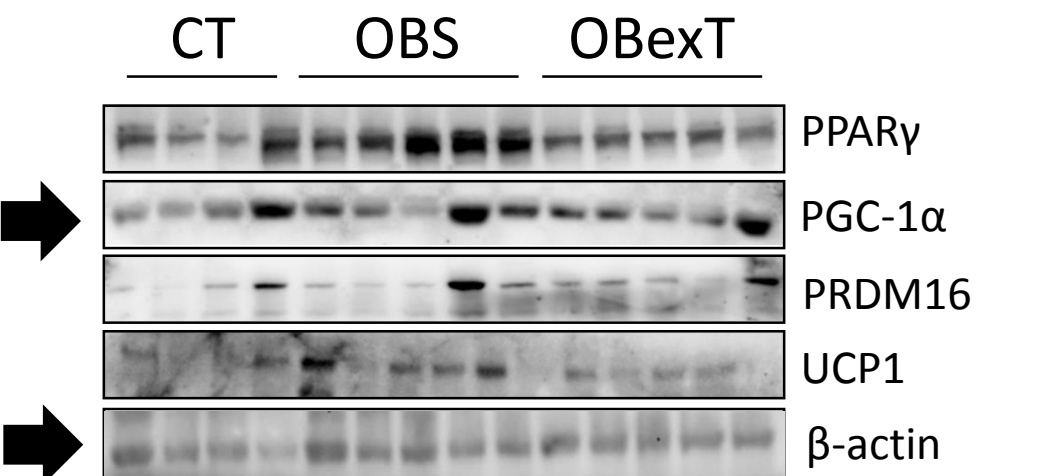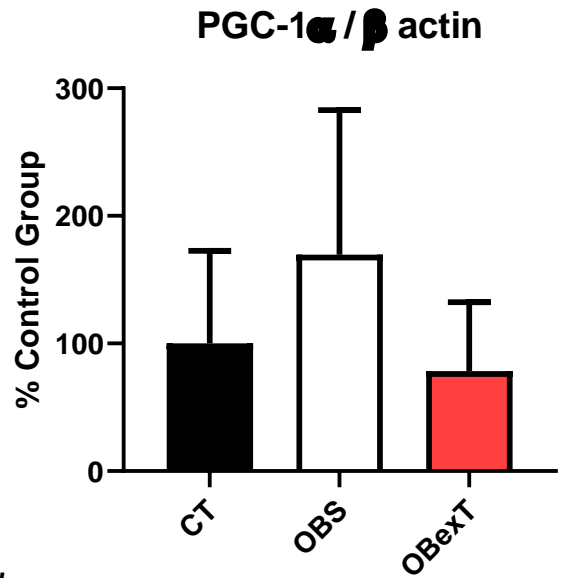

| CT        | OBS      | OBexT     |
|-----------|----------|-----------|
| 77.31078  | 351.2164 | 111.71510 |
| 75.38944  | 54.1691  | 42.79538  |
| 41.20941  | 108.4584 | 41.08689  |
| 206.09040 | 191.9128 | 38.73509  |
|           | 142.9172 | 157.78820 |

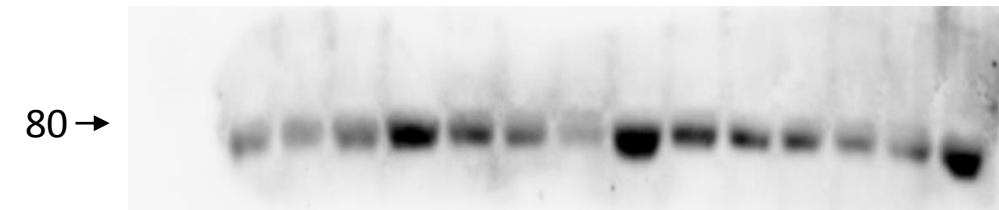

PGC-1 $\alpha$

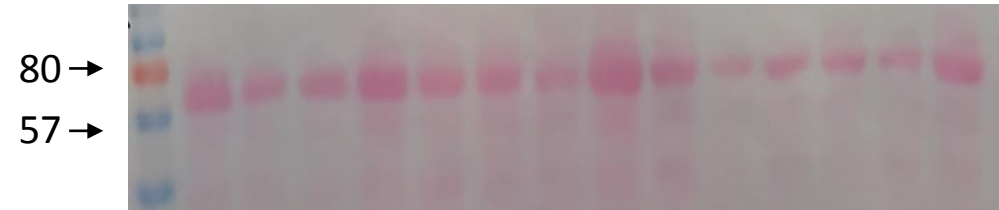

Original PGC-1 $\alpha$

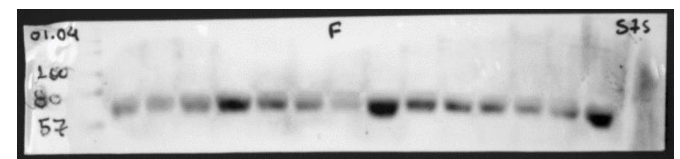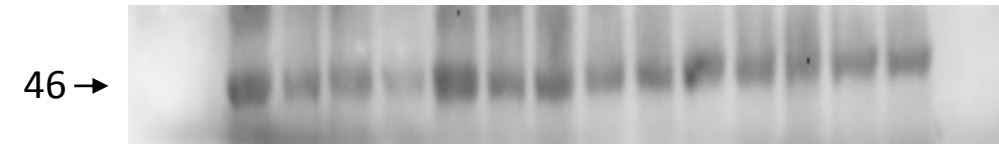

$\beta$ -ACTIN

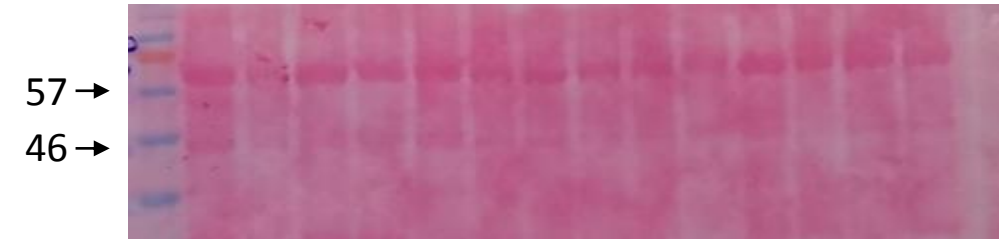

| Tukey's multiple comparisons test | Mean Diff. | 95.00% CI of diff. | Significant? | Summary | Adjusted P Value |  |  |     |
|-----------------------------------|------------|--------------------|--------------|---------|------------------|--|--|-----|
| CT vs. OBS                        | -69.73     | -223.0 to 83.55    | No           | ns      | 0.4617           |  |  | E-F |
| CT vs. OBexT                      | 21.58      | -131.7 to 174.9    | No           | ns      | 0.9240           |  |  | E-G |
| OBS vs. OBexT                     | 91.31      | -53.21 to 235.8    | No           | ns      | 0.2461           |  |  | F-G |

  

| Test details  | Mean 1 | Mean 2 | Mean Diff. | SE of diff. | n1 | n2 | q      | DF |
|---------------|--------|--------|------------|-------------|----|----|--------|----|
| CT vs. OBS    | 100.0  | 169.7  | -69.73     | 56.75       | 4  | 5  | 1.738  | 11 |
| CT vs. OBexT  | 100.0  | 78.42  | 21.58      | 56.75       | 4  | 5  | 0.5376 | 11 |
| OBS vs. OBexT | 169.7  | 78.42  | 91.31      | 53.51       | 5  | 5  | 2.413  | 11 |

**Fig. 6A and D**

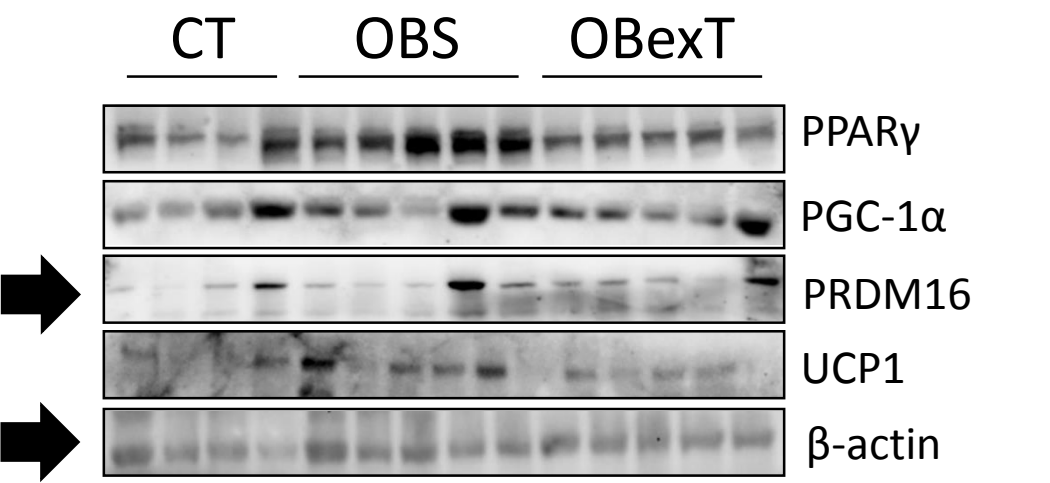

**PRDM16 /  $\beta$  actin**

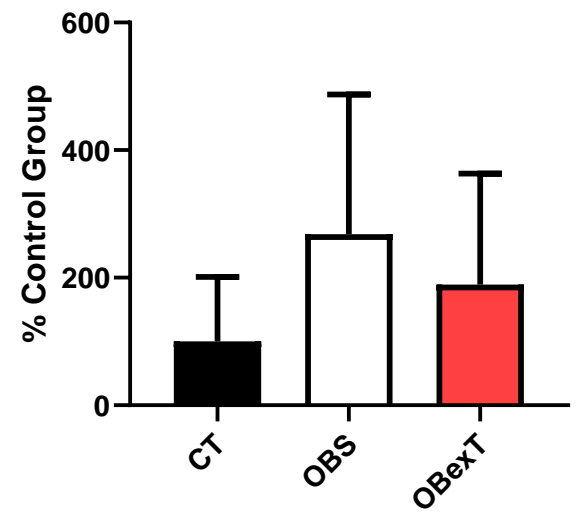

| CT       | OBS       | OBexT     |
|----------|-----------|-----------|
| 78.79396 | 280.07440 | 243.40850 |
| 26.10543 | 38.70540  | 91.24223  |
| 47.01094 | 110.32670 | 83.31519  |
| 48.08970 | 603.92660 | 56.37523  |
|          | 308.26130 | 471.57410 |

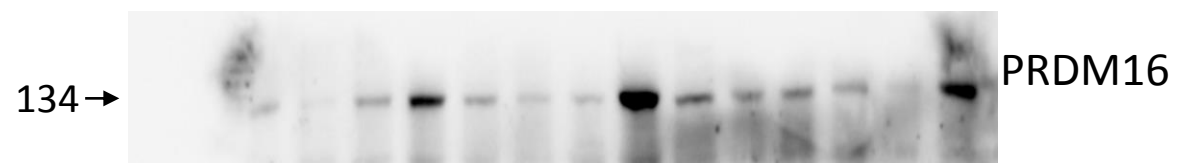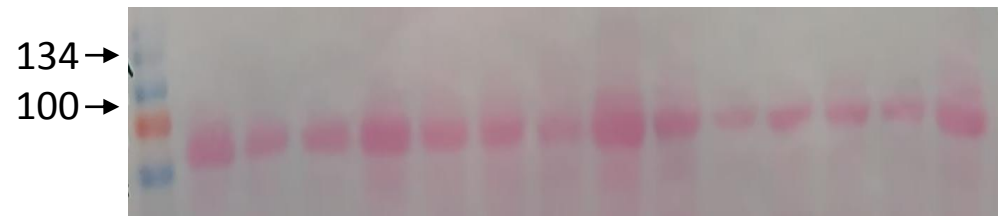

**Original PRDM16**

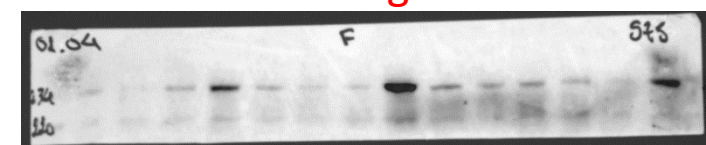

| Tukey's multiple comparisons test | Mean Diff. | 95.00% CI of diff. | Significant? | Summary     | Adjusted P Value |     |       |    |
|-----------------------------------|------------|--------------------|--------------|-------------|------------------|-----|-------|----|
| CT vs. OBS                        | -168.3     | -488.6 to 152.1    | No           | ns          | 0.3653           | I-J |       |    |
| CT vs. OBexT                      | -89.18     | -409.5 to 231.1    | No           | ns          | 0.7387           | I-K |       |    |
| OBS vs. OBexT                     | 79.08      | -222.9 to 381.1    | No           | ns          | 0.7643           | J-K |       |    |
| Test details                      | Mean 1     | Mean 2             | Mean Diff.   | SE of diff. | n1               | n2  | q     | DF |
| CT vs. OBS                        | 100.0      | 268.3              | -168.3       | 118.6       | 4                | 5   | 2.006 | 11 |
| CT vs. OBexT                      | 100.0      | 189.2              | -89.18       | 118.6       | 4                | 5   | 1.063 | 11 |
| OBS vs. OBexT                     | 268.3      | 189.2              | 79.08        | 111.8       | 5                | 5   | 1.000 | 11 |

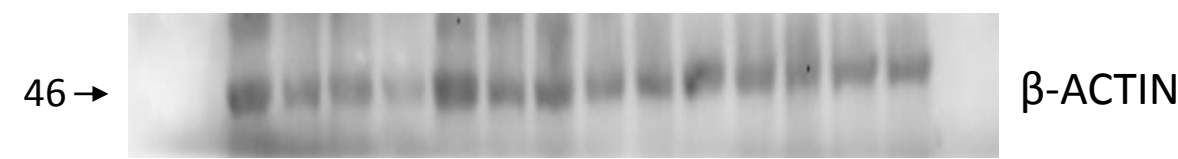

**Fig. 6A and E**

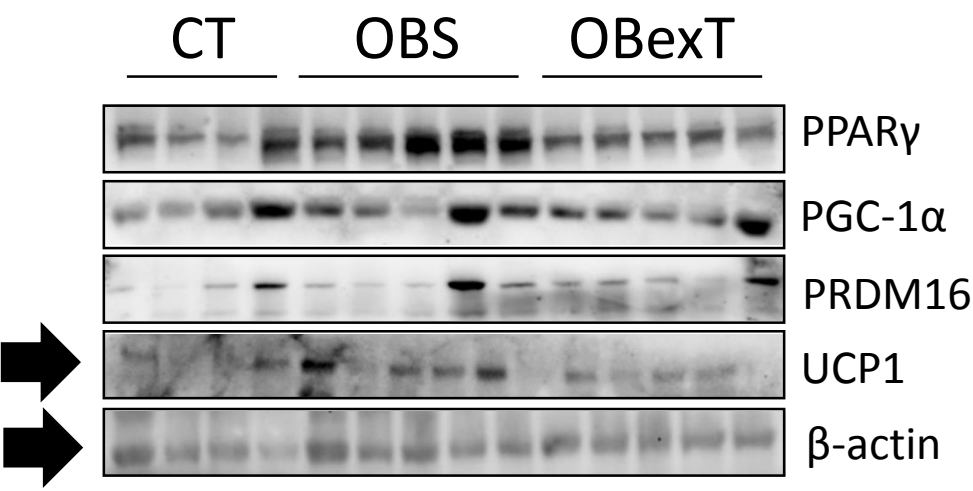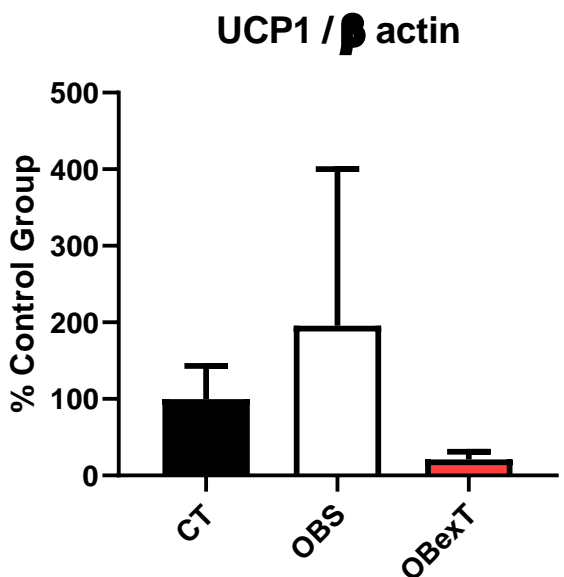

| CT        | OBS       | OBexT    |
|-----------|-----------|----------|
| 108.99350 | 550.49020 | 13.59455 |
| 102.99090 | 37.03126  | 23.13375 |
| 41.76868  | 165.05340 | 14.30664 |
| 146.24690 | 83.94919  | 17.85493 |
|           | 142.35640 | 37.35893 |

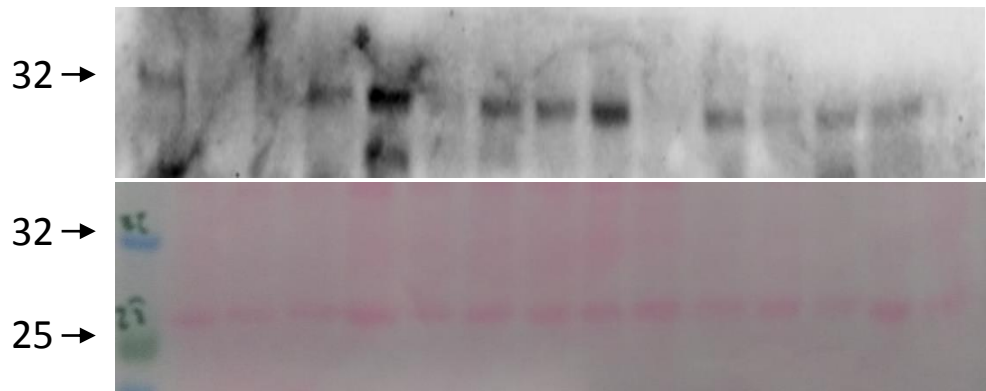

UCP1

Original UCP1

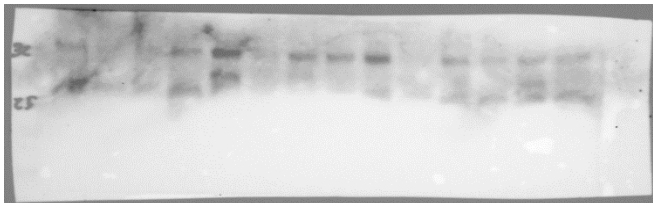

$\beta$ -ACTIN

| Tukey's multiple comparisons test | Mean Diff. | 95.00% CI of diff. | Significant? | Summary | Adjusted P Value |     |  |  |
|-----------------------------------|------------|--------------------|--------------|---------|------------------|-----|--|--|
| CT vs. OBS                        | -95.78     | -323.2 to 131.7    | No           | ns      | 0.5123           | M-N |  |  |
| CT vs. OBexT                      | 78.75      | -148.7 to 306.2    | No           | ns      | 0.6304           | M-O |  |  |
| OBS vs. OBexT                     | 174.5      | -39.89 to 388.9    | No           | ns      | 0.1155           | N-O |  |  |

  

| Test details  | Mean 1 | Mean 2 | Mean Diff. | SE of diff. | n1 | n2 | q     | DF |
|---------------|--------|--------|------------|-------------|----|----|-------|----|
| CT vs. OBS    | 100.0  | 195.8  | -95.78     | 84.21       | 4  | 5  | 1.609 | 11 |
| CT vs. OBexT  | 100.0  | 21.25  | 78.75      | 84.21       | 4  | 5  | 1.323 | 11 |
| OBS vs. OBexT | 195.8  | 21.25  | 174.5      | 79.39       | 5  | 5  | 3.109 | 11 |



Fig. 6F

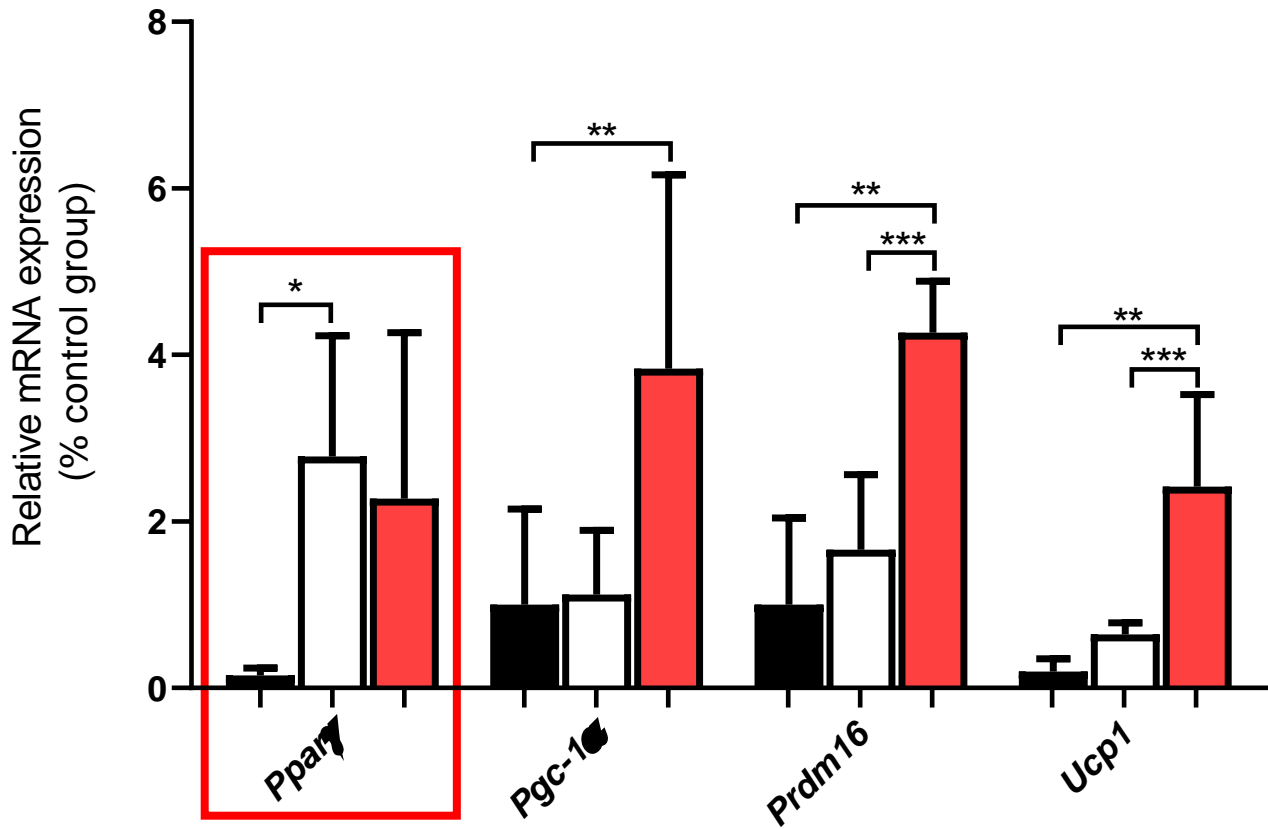

PPAR $\gamma$

| CT    | OBS  | OBExT |
|-------|------|-------|
| 0.20  | 2.64 | 1.92  |
| 0.07  | 1.67 | 2.14  |
| 0.13  | 4.87 | 4.93  |
| 0.14  | 1.94 | 0.10  |
| 6.11* |      |       |
| 0.07  |      |       |
| 0.30  |      |       |

| Tukey's multiple comparisons test | Mean Diff. | 95.00% CI of diff. | Significant? | Summary | Adjusted P Value |     |  |  |
|-----------------------------------|------------|--------------------|--------------|---------|------------------|-----|--|--|
| CT vs. OBS                        | -2.628     | -4.876 to -0.3804  | Yes          | *       | 0.0228           | A-B |  |  |
| CT vs. OBExT                      | -2.121     | -4.369 to 0.1271   | No           | ns      | 0.0647           | A-C |  |  |
| OBS vs. OBExT                     | 0.5075     | -1.955 to 2.970    | No           | ns      | 0.8453           | B-C |  |  |

  

| Test details  | Mean 1 | Mean 2 | Mean Diff. | SE of diff. | n1 | n2 | q      | DF |
|---------------|--------|--------|------------|-------------|----|----|--------|----|
| CT vs. OBS    | 0.1517 | 2.780  | -2.628     | 0.8323      | 6  | 4  | 4.466  | 11 |
| CT vs. OBExT  | 0.1517 | 2.273  | -2.121     | 0.8323      | 6  | 4  | 3.604  | 11 |
| OBS vs. OBExT | 2.780  | 2.273  | 0.5075     | 0.9117      | 4  | 4  | 0.7872 | 11 |

| Cleaned data |     |       | Outliers |   |
|--------------|-----|-------|----------|---|
| A            | B   | C     | D        | E |
| CT           | OBS | OBExT |          |   |
| 6.110        |     |       |          |   |

Fig. 6F

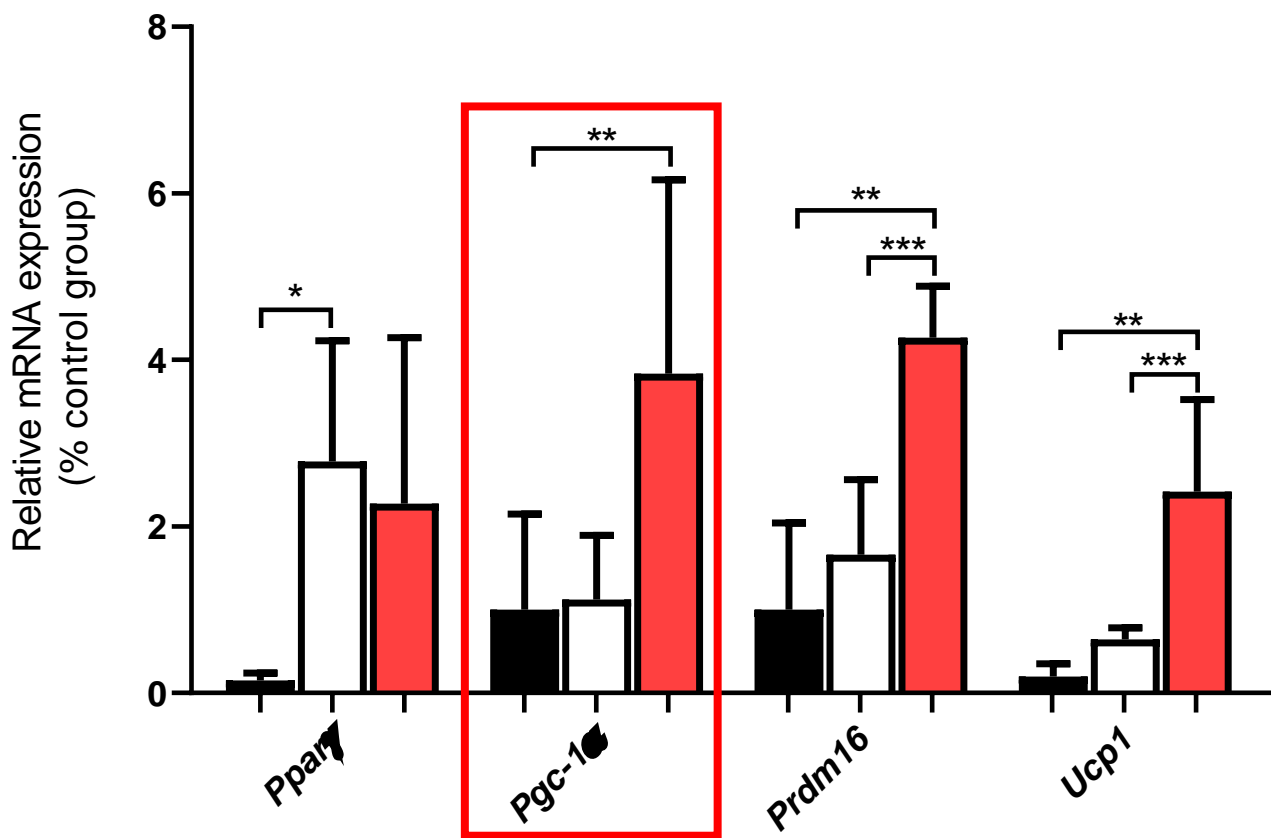

PGC-1 $\alpha$

|  | CT   | OBS  | OBexT |
|--|------|------|-------|
|  | 0.38 | 0.70 | 0.70  |
|  | 0.21 | 1.87 | 5.89  |
|  | 3.13 | 1.66 | 3.48  |
|  | 2.06 | 0.25 | 5.27  |
|  | 0.39 |      |       |
|  | 0.73 |      |       |
|  | 0.10 |      |       |

| Tukey's multiple comparisons test | Mean Diff. | 95.00% CI of diff. | Significant? | Summary     | Adjusted P Value |     |        |    |
|-----------------------------------|------------|--------------------|--------------|-------------|------------------|-----|--------|----|
| CT vs. OBS                        | -0.1200    | -2.579 to 2.339    | No           | ns          | 0.9907           | E-F |        |    |
| CT vs. OBexT                      | -2.835     | -5.294 to -0.3761  | Yes          | *           | 0.0242           | E-G |        |    |
| OBS vs. OBexT                     | -2.715     | -5.489 to 0.05902  | No           | ns          | 0.0552           | F-G |        |    |
| Test details                      | Mean 1     | Mean 2             | Mean Diff.   | SE of diff. | n1               | n2  | q      | DF |
| CT vs. OBS                        | 1.000      | 1.120              | -0.1200      | 0.9217      | 7                | 4   | 0.1841 | 12 |
| CT vs. OBexT                      | 1.000      | 3.835              | -2.835       | 0.9217      | 7                | 4   | 4.350  | 12 |
| OBS vs. OBexT                     | 1.120      | 3.835              | -2.715       | 1.040       | 4                | 4   | 3.693  | 12 |





# The ARRIVE Essential 10: Compliance Questionnaire

Use this questionnaire to evaluate how well a manuscript complies with the ARRIVE Essential 10. It can be applied to any manuscript describing comparative experiments in living animals, by assessors such as journal staff, editors, or peer reviewers.

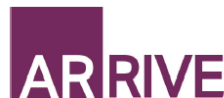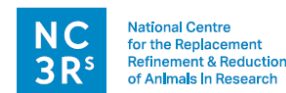

| Item                             | Question(s)                                                                                                                                   | Answers                                                                                                                                                                      |
|----------------------------------|-----------------------------------------------------------------------------------------------------------------------------------------------|------------------------------------------------------------------------------------------------------------------------------------------------------------------------------|
| 1 Study Design                   | Are all experimental and control groups clearly identified?                                                                                   | <input checked="" type="checkbox"/> Yes, for at least one experiment<br><input type="checkbox"/> No                                                                          |
|                                  | Is the experimental unit (e.g. an animal, litter or cage of animals) clearly identified?                                                      | <input checked="" type="checkbox"/> Yes, for at least one experiment<br><input type="checkbox"/> No                                                                          |
| 2 Sample Size                    | Is the exact number of experimental units in each group at the start of the study provided (e.g. in the format 'n=')?                         | <input checked="" type="checkbox"/> Yes, for at least one experiment<br><input type="checkbox"/> No                                                                          |
|                                  | Is the method by which the sample size was chosen explained?                                                                                  | <input checked="" type="checkbox"/> Yes, for at least one experiment<br><input type="checkbox"/> No                                                                          |
| 3 Inclusion & Exclusion Criteria | Are the criteria used for including and excluding animals, experimental units, or data points provided?                                       | <input checked="" type="checkbox"/> Yes, for at least one experiment<br><input type="checkbox"/> No                                                                          |
|                                  | Are any exclusions of animals, experimental units, or data points reported, or is there a statement indicating that there were no exclusions? | <input checked="" type="checkbox"/> Yes, for at least one analysis<br><input type="checkbox"/> No                                                                            |
| 4 Randomisation                  | Is the method by which experimental units were allocated to control and treatment groups described?                                           | <input type="checkbox"/> Yes, for at least one experiment<br><input checked="" type="checkbox"/> No                                                                          |
| 5 Blinding                       | Is it clear whether researchers were aware of, or blinded to, the group allocation at any stage of the experiment or data analysis?           | <input checked="" type="checkbox"/> Yes, for at least one experiment<br><input type="checkbox"/> No                                                                          |
| 6 Outcome Measures               | For all experimental outcomes presented, are details provided of exactly what parameter was measured?                                         | <input checked="" type="checkbox"/> Yes, for at least one experiment<br><input type="checkbox"/> No                                                                          |
| 7 Statistical Methods            | Is the statistical approach used to analyse each outcome detailed?                                                                            | <input checked="" type="checkbox"/> Yes, for at least one analysis<br><input type="checkbox"/> No                                                                            |
|                                  | Is there a description of any methods used to assess whether data met statistical assumptions?                                                | <input checked="" type="checkbox"/> Yes, for at least one analysis<br><input type="checkbox"/> No<br><input type="checkbox"/> Not applicable                                 |
|                                  |                                                                                                                                               |                                                                                                                                                                              |
| 8 Experimental Animals           | Are all species of animal used specified?                                                                                                     | <input checked="" type="checkbox"/> Yes, for at least one experiment<br><input type="checkbox"/> No                                                                          |
|                                  | Is the sex of the animals specified?                                                                                                          | <input checked="" type="checkbox"/> Yes, for at least one experiment<br><input type="checkbox"/> No<br><input type="checkbox"/> Not applicable to species                    |
|                                  | Is at least one of age, weight or developmental stage of the animals specified?                                                               | <input checked="" type="checkbox"/> Yes, for at least one experiment<br><input type="checkbox"/> No                                                                          |
| 9 Experimental Procedures        | Are both the timing and frequency with which procedures took place specified?                                                                 | <input checked="" type="checkbox"/> Yes, for at least one experiment<br><input type="checkbox"/> No                                                                          |
|                                  | Are details of acclimatisation periods to experimental locations provided?                                                                    | <input checked="" type="checkbox"/> Yes, for at least one experiment<br><input type="checkbox"/> No                                                                          |
| 10 Results                       | Are descriptive statistics for each experimental group provided, with a measure of variability (e.g. mean and SD, or median and range)?       | <input checked="" type="checkbox"/> Yes, for at least one experiment<br><input type="checkbox"/> No<br><input type="checkbox"/> Not applicable to the type of data collected |
|                                  | Is the effect size and confidence interval provided?                                                                                          | <input checked="" type="checkbox"/> Yes, for at least one experiment<br><input type="checkbox"/> No<br><input type="checkbox"/> Not applicable to the type of analysis used  |

## Notes on questionnaire design

The ARRIVE guidelines are a useful resource for authors preparing manuscripts describing animal research, and also provide a framework to evaluate the transparency of those manuscripts. To assess reporting quality, numerous studies have in the past sought to operationalise reporting guidelines (including ARRIVE). Typically, this involves scoring a manuscript's degree of compliance with guideline items in a binary fashion (e.g. an item is either not reported or reported) [1-3], a graded fashion (e.g. not, partially, or completely reported) [4,5], or a combination of the two [6].

This questionnaire has been designed to be as concise and user-friendly as possible. The number of questions used to assess a manuscript's compliance has been kept to a minimum, and in most cases each question is designed to be answered in a binary fashion. Compliance with some Essential 10 sub-items is inherently impossible to judge in this way, instead requiring a subjective judgement on the level of detail provided. For this reason, not all sub-items are represented by a question in this questionnaire.

To facilitate binary answers, it has been necessary to identify the minimum information in a manuscript sufficient to comply with each question. The strengths of this approach include the relatively short length of the questionnaire (and the correspondingly low time burden of using it), and the avoidance of ambiguity that would arise from a graded answering system, in which an intermediate score (e.g. 'partially/insufficiently reported') could denote a number of distinct deficiencies in compliance with an item (e.g. either only part of the item was complied with, or only the reporting of some experiments in the manuscript complied with the item.)

Limitations of this approach centre on the necessity to identify the minimum information sufficient to comply with each question. In some cases, this has resulted in questions that require a guideline sub-item's criteria to have been fulfilled in the reporting of only one experiment in a manuscript. As a result, not all experiments in a manuscript may be described in a way that fulfils that criterion, despite the manuscript being considered to comply with the guidelines overall.

## References

- Hair *et al* (2020). *Res Integ Peer Rev*. doi: [10.1186/s41073-019-0069-3](https://doi.org/10.1186/s41073-019-0069-3)
- Tihanyi *et al* (2019). *J Surg Res*. doi: [10.1016/j.jss.2018.10.038](https://doi.org/10.1016/j.jss.2018.10.038)
- Zhao *et al* (2020). *BMC Vet Res*. doi: [10.1186/s12917-020-02664-1](https://doi.org/10.1186/s12917-020-02664-1)
- Han *et al* (2017). *Plos One*. doi: [10.1371/journal.pone.0183591](https://doi.org/10.1371/journal.pone.0183591)
- Chatzimanouil *et al* (2019). *J Am Soc Nephrol*. doi: [10.1681/ASN.2018050515](https://doi.org/10.1681/ASN.2018050515)
- Leung *et al* (2018). *Plos One*. doi: [10.1371/journal.pone.0197882](https://doi.org/10.1371/journal.pone.0197882)
